# Supplementary material
Source: PubMed Central journal article supplement (PMC10181795)
Supplement: NIHMS1746368-supplement-Supplement.pdf [file NIHMS1746368-supplement-Supplement.pdf]

# Supplementary Appendix for “Conditional Functional Graphical Models”

AUTHOR A, AUTHOR B  
AUTHOR C, AND AUTHOR D

## S.1 Technical lemmas

We first present two lemmas that connect the operator  $\mathfrak{V}_{X_i X_j | X_{-(i,j)}}^y$  with the conditional distribution  $(X_i, X_j)^\top | [X_{-(i,j)}, Y = y]$ . For any subvector  $A \subseteq V$ , let  $\mathfrak{M}_{X_A | X_{A^c}}^y = \left[ \mathfrak{V}_{X_{A^c} X_{A^c}}^y \right]^\dagger \mathfrak{V}_{X_{A^c} X_A}^y$ .

**Lemma S1** *If Assumptions 1 to 3 hold, then, for any  $(i, j) \in V \times V$  and  $y \in \Omega_Y$ ,*

(i) *For any  $(f, g) \in \Omega_{X_i} \times \Omega_{X_j}$ ,  $(\langle f, X_i \rangle \langle g, X_j \rangle)^\top | [X_{-(i,j)}, y]$  follows a bivariate Gaussian distribution, and  $\text{cov}(\langle f, X_i \rangle, \langle g, X_j \rangle | X_{-(i,j)}, y) = \langle f, \mathfrak{V}_{X_i X_j | X_{-(i,j)}}^y g \rangle$ ;*

(ii)  $\mathfrak{V}_{X_i X_j | X_{-(i,j)}}^y = 0$  *if and only if  $X_i \perp\!\!\!\perp X_j | [X_{-(i,j)}, Y = y]$ ;*

(iii)  $\mathfrak{V}_{X_i X_j | X_{-(i,j)}}^y = \sum_{a,b \in N} E(\alpha_i^a \alpha_j^b | X_{-(i,j)}, y) \eta_i^a \otimes \eta_j^b$ .

PROOF. Let  $A = (i, j)$ . By Assumption 3, for any  $f \in \Omega_{X_A}$ ,  $g \in \Omega_{X_{A^c}}$ , and  $y \in \Omega_Y$ ,

$$\begin{aligned} & E \left( \exp \left\{ t_1 \left( \langle f, X_A \rangle - \langle \mathfrak{M}_{X_A | X_{A^c}}^y f, X_{A^c} \rangle \right) + t_2 \langle g, X_{A^c} \rangle \right\} \mid y \right) \\ &= t_1^2 \langle f, \mathfrak{V}_{X_A X_A}^y f \rangle - 2t_1^2 \langle f, \mathfrak{V}_{X_A X_{A^c}}^y \mathfrak{M}_{X_A | X_{A^c}}^y f \rangle + 2t_1 t_2 \langle f, \mathfrak{V}_{X_A X_{A^c}}^y g \rangle \\ &\quad - 2t_1 t_2 \langle g, \mathfrak{V}_{X_{A^c} X_{A^c}}^y \mathfrak{M}_{X_A | X_{A^c}}^y f \rangle + t_1^2 \langle \mathfrak{M}_{X_A | X_{A^c}}^y f, \mathfrak{V}_{X_{A^c} X_{A^c}}^y \mathfrak{M}_{X_A | X_{A^c}}^y f \rangle + t_2^2 \langle g, \mathfrak{V}_{X_{A^c} X_{A^c}}^y g \rangle \\ &= t_1^2 \langle f, \mathfrak{V}_{X_A X_A | X_{A^c}}^y f \rangle + t_2^2 \langle g, \mathfrak{V}_{X_{A^c} X_{A^c}}^y g \rangle. \end{aligned}$$

Therefore,  $\langle f, X_A \rangle - \langle \mathfrak{M}_{X_A | X_{A^c}}^y f, X_{A^c} \rangle$  and  $\langle g, X_{A^c} \rangle$  are independent for all  $g \in \Omega_{X_{A^c}}$ , which implies assertion (i). Assertion (ii) follows immediately by (i). Assertion (iii) can be shown using an argument similar to the proof of Proposition 4 and (i). This completes the proof.  $\square$

Note that Lemma S1 (ii) generalizes the classical result that, under the Gaussian setting, the conditional independence is equivalent to the zero conditional covariance, from the case when  $X$  is a vector of random variables to the case when  $X$  is a vector of random functions. The next lemma provides an alternative expression of  $\mathfrak{V}_{X_i X_j | X_{-(i,j)}}^y$  using  $\mathfrak{C}_{X_i X_j}^y$ .

**Lemma S2** *If Assumptions 1 to 5 hold, then, for any  $(i, j) \in \mathbf{V} \times \mathbf{V}$ ,*

$$\mathfrak{Y}_{X_i X_j | X_{-(i,j)}}^y = \mathfrak{Y}_{X_i X_j}^y - [\mathfrak{Y}_{X_i X_i}^y]^{1/2} \mathfrak{C}_{X_i X_{-(i,j)}}^y [\mathfrak{C}_{X_{-(i,j)} X_{-(i,j)}}^y]^{-1} \mathfrak{C}_{X_{-(i,j)} X_j}^y [\mathfrak{Y}_{X_j X_j}^y]^{1/2}.$$

PROOF. Denote the right hand side of the above quantity as  $\Sigma_{X_i X_j | X_{-(i,j)}}^y$ . Then by direct calculation, for any  $f \in \Omega_{X_i}$  and  $h \in \Omega_{X_{-(i,j)}}$ , we have

$$\begin{aligned} E [(\langle f, X_i \rangle - \langle h, X_{-(i,j)} \rangle)^2 | y] &= \langle f, \Sigma_{X_i X_j | X_{-(i,j)}}^y f \rangle + \| [\mathfrak{C}_{X_{-(i,j)} X_{-(i,j)}}^y]^{-1/2} \mathfrak{C}_{X_{-(i,j)} X_i}^y \\ &\quad \times [\mathfrak{Y}_{X_i X_i}^y]^{1/2} f - [\mathfrak{C}_{X_{-(i,j)} X_{-(i,j)}}^y]^{1/2} \mathfrak{D}_{X_{-(i,j)}}^y h \|^2 \equiv V_1(f) + V_2(f, h). \end{aligned}$$

Following a similar proof in Fukumizu et al. (2009, Proposition 2), we have

$$\begin{aligned} V_1(f) &= \inf \left\{ E [(\langle f, X_i \rangle - \langle h, X_{-(i,j)} \rangle)^2 | y] : h \in \Omega_{X_{-(i,j)}} \right\} \\ &= E [(\langle f, X_i \rangle - \langle h', X_{-(i,j)} \rangle)^2 | y], \end{aligned}$$

where  $h' = \mathfrak{M}_{X_i | X_{-(i,j)}}^y f$ , and the last equality holds by Lemma S1(i), and the definition of conditional expectation. This implies that  $V_2(f, h') = 0$ , and

$$[\mathfrak{C}_{X_{-(i,j)} X_{-(i,j)}}^y]^{-1/2} \mathfrak{C}_{X_{-(i,j)} X_i}^y [\mathfrak{Y}_{X_i X_i}^y]^{1/2} f = [\mathfrak{C}_{X_{-(i,j)} X_{-(i,j)}}^y]^{1/2} \mathfrak{D}_{X_{-(i,j)}}^y \mathfrak{M}_{X_i | X_{-(i,j)}}^y f,$$

for all  $f \in \Omega_{X_i}$ . Denote the above relation as  $V_3 f = V_4 f$ ; therefore,

$$\mathfrak{Y}_{X_i X_j}^y + V_3^* V_3 = \Sigma_{X_i X_j | X_{-(i,j)}}^y = \mathfrak{Y}_{X_i X_j}^y + V_4^* V_4 = \mathfrak{Y}_{X_i X_j | X_{-(i,j)}}^y.$$

This completes the proof. □

We next present a lemma that extends the classical Bernstein inequality to Hilbert spaces. Its proof immediately follows Bosq (2000, Theorem 2.5) and is omitted.

**Lemma S3 (Bernstein's inequality in Hilbert space)** *Suppose  $U^1, \dots, U^n$  are i.i.d. samples from  $U$  in  $\Omega_U$ , where  $U$  is a random element with  $E(U) = 0$ , and  $\Omega_U$  is a generic Hilbert space. If, for any  $\ell \in \mathbb{N}$ ,  $E \|U\|_\Omega^\ell \leq b^\ell \ell!$ , then, for any  $t > 0$ ,*

$$P \left[ \|E_n U\|_{\Omega_U} > t \right] \leq 2 \exp \left( \frac{-nt^2}{4b^2 + 2bt} \right).$$

Note that the function  $f(t) = t^2/(4b^2 + 2bt) > t/(4b)$  if  $t > 2b$ , and  $f(t) \geq t^2/(8b^2)$  if  $t \leq 2b$ . Therefore,

$$P [\|E_n U\|_{\Omega_U} > t] \leq 2 \exp[-cn(t \wedge t^2)], \quad (\text{S1})$$

for some constant  $c > 0$ . This means, when the moment condition  $E\|U\|_{\Omega}^{\ell} \leq b^{\ell} \ell!$  holds, the probability of  $\{\|E_n U\|_{\Omega_U} > t\}$  behaves as a sub-Gaussian when  $t$  is small, and as a sub-Exponential when  $t$  is large; see also Hanson and Wright (1971).

The next lemma gives a result on the perturbation of linear operators.

**Lemma S4** *Let  $\mathfrak{V}$  and  $\hat{\mathfrak{V}}$  be the population and sample covariance operators of  $U \in \Omega_U$ , and  $\{(\lambda^a, \eta^a)\}_{a=1}^N$  and  $\{(\hat{\lambda}^a, \hat{\eta}^a)\}_{a=1}^n$  be their eigenvalue and eigenfunction pairs, with  $\lambda^1 > \lambda^2 > \dots$ , and  $\hat{\lambda}^1 \geq \hat{\lambda}^2 \geq \dots \geq \hat{\lambda}^n$ . Then  $\max_{a=1, \dots, m} \|\hat{\eta}^a - \eta^a\|_{\Omega} \leq 4\kappa_m^{-1} \|\hat{\mathfrak{V}} - \mathfrak{V}\|$ , where  $\kappa_m = \min\{\lambda^a - \lambda^{a+1} : a = 1, \dots, m+1\}$ .*

PROOF. Suppose  $\{\tilde{\lambda}^1, \dots, \tilde{\lambda}^n\}$  are the closest members to  $\{\lambda^1, \dots, \lambda^n\}$  in the spectrum of  $\hat{\mathfrak{V}}$ . Then by Kato (1980, Theorem 4.10),  $\max\{|\tilde{\lambda}^a - \lambda^a| : a = 1, \dots, n\} \leq \|\hat{\mathfrak{V}} - \mathfrak{V}\|$ . This implies that  $\tilde{\lambda}^a < \lambda^a$ , for all  $a = m+1, \dots, n$ . Therefore, we have  $\tilde{\lambda}^a < \lambda^{m+1} + \|\hat{\mathfrak{V}} - \mathfrak{V}\|$  for all  $a = m+1, \dots, n$ . Similarly, we can show that  $\tilde{\lambda}^a > \lambda^m - \|\hat{\mathfrak{V}} - \mathfrak{V}\|$  for all  $a = 1, \dots, m$ .

When  $\kappa_m \leq 2\|\hat{\mathfrak{V}} - \mathfrak{V}\|$ , the asserted inequality of this lemma holds.

When  $\kappa_m > 2\|\hat{\mathfrak{V}} - \mathfrak{V}\|$ , we have  $\lambda^m - \|\hat{\mathfrak{V}} - \mathfrak{V}\| > \lambda^{m+1} + \|\hat{\mathfrak{V}} - \mathfrak{V}\|$ , which, together with the above bounds for  $\tilde{\lambda}^a$ , implies that  $\min\{\tilde{\lambda}^1, \dots, \tilde{\lambda}^m\} > \max\{\tilde{\lambda}^{m+1}, \dots, \tilde{\lambda}^n\}$ . Moreover, for any  $a = 1, \dots, m$ ,  $\tilde{\lambda}^{a+1} \leq \lambda^{a+1} + \|\hat{\mathfrak{V}} - \mathfrak{V}\| < \lambda^a - \|\hat{\mathfrak{V}} - \mathfrak{V}\| \leq \tilde{\lambda}^a$ , indicating that  $\hat{\lambda}^a = \tilde{\lambda}^a$ , for all  $a = 1, \dots, m$ . Therefore,  $\max\{|\hat{\lambda}^a - \lambda^a| : a = 1, \dots, m\} \leq \|\hat{\mathfrak{V}} - \mathfrak{V}\|$ . By Kazdan (1971, Lemma 2), we obtain the asserted inequality, and complete the proof.  $\square$

The next lemma shows that the intermediate operator  $\mathfrak{P}^y(\epsilon_2)$  and the estimated conditional correlation operator  $\hat{\mathfrak{C}}_{XX}^y(d, \epsilon_Y, \epsilon_1)$  are both semi-positive definite.

**Lemma S5** *If Assumptions 1 to 5 hold, then  $\mathfrak{P}^y(\epsilon_2)$  is semi-positive definite and bounded. Moreover, if  $\kappa_Y(y_1, y_2) \geq 0$  for any  $y_1, y_2 \in \Omega_Y$ , then  $\hat{\mathfrak{C}}_{XX}^y(d, \epsilon_Y, \epsilon_1)$  is also semi-positive definite.*

PROOF. By Proposition S3,  $\mathfrak{C}_{XX}^y$  is positive definite, which implies that  $\mathfrak{P}^y(\epsilon_2)$  is semi-positive definite. Moreover,  $\mathfrak{P}^y(\epsilon_2)$  is bounded because  $\|\mathfrak{P}^y(\epsilon_2)\| \leq \|\mathfrak{P}^y\|$ . Also note that, from the proof of Proposition 5,  $\hat{\mathfrak{V}}_{XX}^y(d, \epsilon_Y)$  is semi-positive definite. Furthermore, for any  $f = (f_1, \dots, f_p)^{\top} \in \Omega_X$ ,

$$\begin{aligned}
& \left\langle f, \left( \hat{\mathfrak{C}}_{XX}^y(d, \epsilon_Y, \epsilon_1) - \{[\hat{\mathfrak{D}}_X^y(d, \epsilon_Y)]^{\dagger\epsilon_1}\}^{1/2} \hat{\mathfrak{Y}}_{XX}^y(d, \epsilon_Y) \{[\hat{\mathfrak{D}}_X^y(d, \epsilon_Y)]^{\dagger\epsilon_1}\}^{1/2} \right) f \right\rangle \\
& = \epsilon_1 \sum_{i=1}^p \langle f_i, [\hat{\mathfrak{Y}}_{X_i X_i}^y(d, \epsilon_Y)]^{\dagger\epsilon_1} f_i \rangle \geq 0,
\end{aligned}$$

where  $\hat{\mathfrak{D}}_X^y(d, \epsilon_Y)$  is a block diagonal matrix with  $[\hat{\mathfrak{D}}_X^y(d, \epsilon_Y)]_{ii} = \hat{\mathfrak{Y}}_{X_i X_i}^y(d, \epsilon_Y)$ , for  $i \in \mathbf{V}$ . This implies  $\hat{\mathfrak{C}}_{XX}^y(d, \epsilon_Y, \epsilon_1)$  is semi-positive definite.  $\square$

## S.2 Proofs

**Proof of Proposition 1:** For  $\mathfrak{Y}_{YY}$ , note that for any  $h_1, h_2 \in \mathcal{H}_Y$ ,  $E[h_1(Y)h_2(Y)] \leq \|h_1\| \|h_2\| E\|\kappa_Y(\cdot, Y)\|^2$ , which is bounded by  $M_Y \|h_1\| \|h_2\|$  by Assumption 1. Then the existence and uniqueness of  $\mathfrak{Y}_{YY}$  are ensured by the Riesz representation theorem.

For  $\mathfrak{Y}_{X_i X_j}$ , because  $E\|X_i\|_{\Omega_{X_i}}^2$  is finite by Assumption 1, the existence and uniqueness of  $\mathfrak{Y}_{X_i X_j}$  can be proved by a similar argument as that for  $\mathfrak{Y}_{YY}$ .

For  $\mathfrak{Y}_{Y X_{ij}}$ , note that the expectation  $E[\langle X_i, f \rangle \langle X_j, g \rangle h(Y)]$  is bounded by

$$E|\langle X_i, f \rangle \langle X_j, g \rangle h(Y)| \leq E^{1/2} \langle h, \kappa_Y(\cdot, Y) \rangle^2 E^{1/2} [E^2(|\langle X_i, f \rangle \langle X_j, g \rangle| | Y)]. \quad (\text{S2})$$

Moreover, the conditional expectation  $E(|\langle X_i, f \rangle \langle X_j, g \rangle| | Y) \leq \|f\| \|g\| E^{1/2}(\|X_i\|^2 | Y) E^{1/2}(\|X_j\|^2 | Y) < M_0^2 \|f\| \|g\|$  by Assumption 1. This implies the right hand side of (S2) is bounded by  $\|h\| \|f\| \|g\| M_0^2 E^{1/2} \kappa_Y(Y, Y)$ . This completes the proof.  $\square$

**Proof of Proposition 2:** By definition, for any  $(f, g) \in \Omega_{X_i} \times \Omega_{X_j}$ , and  $h \in \mathcal{H}_Y$ ,

$$E[\langle f, X_i \rangle \langle g, X_j \rangle h(Y)] = \langle \mathfrak{Y}_{YY} h, \mathfrak{M}_{X_{ij}|Y}(f \otimes g) \rangle = E[\mathfrak{M}_{X_{ij}|Y}(f \otimes g) \circ (Y) h(Y)],$$

implying  $E\{[\langle f, X_i \rangle \langle g, X_j \rangle - \mathfrak{M}_{X_{ij}|Y}(f \otimes g) \circ (Y)] h(Y)\} = 0$ , for  $h \in \mathcal{H}_Y$ . By the definition of conditional expectation and the fact that  $\mathcal{H}_Y$  is dense in  $L_2(P_Y)$ , the proof is completed.  $\square$

**Proof of Proposition 4:** By Definition 2, we have  $\text{range}(\mathfrak{Y}_{X_i X_j}^y) \subseteq \text{span}(\{\eta_i^a\}_{a=1}^\infty)$ , and  $\ker(\mathfrak{Y}_{X_i X_j}^y)^\perp \supseteq \text{span}(\{\eta_j^b\}_{b=1}^\infty)^\perp$ . Therefore,

$$\langle f, \mathfrak{Y}_{X_i X_j}^y g \rangle = \sum_{a,b \in \mathbb{N}} E(\alpha_i^a \alpha_j^b | y) \langle f, \eta_i^a \rangle \langle g, \eta_j^b \rangle = \sum_{a,b \in \mathbb{N}} E(\alpha_i^a \alpha_j^b | y) \langle f, (\eta_i^a \otimes \eta_j^b) g \rangle,$$

for any  $f \in \text{span}(\{\eta_i^a\}_{a=1}^\infty)$  and  $g \in \text{span}(\{\eta_j^b\}_{b=1}^\infty)$ , where the last equality is by the definition of tensor product. This completes the proof.  $\square$

**Proof of Theorem 1:** Let  $\mathfrak{C}_{ij|-(i,j)}^y = \mathfrak{C}_{X_i X_{-(i,j)}}^y [\mathfrak{C}_{X_{-(i,j)} X_{-(i,j)}}^y]^{-1} \mathfrak{C}_{X_{-(i,j)} X_j}^y$ . By Lemma S2, we have  $\mathfrak{Y}_{X_i X_j | X_{-(i,j)}}^y = [\mathfrak{Y}_{X_i X_i}^y]^{1/2} [\mathfrak{C}_{X_i X_j}^y - \mathfrak{C}_{ij|-(i,j)}^y] [\mathfrak{Y}_{X_j X_j}^y]^{1/2}$ , implying that

$$\mathfrak{Y}_{X_i X_j | X_{-(i,j)}}^y = 0 \quad \Leftrightarrow \quad \mathfrak{C}_{X_i X_j}^y - \mathfrak{C}_{ij|-(i,j)}^y = 0. \quad (\text{S3})$$

It suffices to show that  $\mathfrak{C}_{X_i X_j}^y - \mathfrak{C}_{ij|-(i,j)}^y = 0$  if and only if  $[\mathfrak{P}^y]_{i,j} = 0$ , which, together with (S3) and Lemma S1, imply that  $X_i \perp X_j \mid (X_{-(i,j)}, y)$  if and only if  $[\mathfrak{P}^y]_{i,j} = 0$ .

Let  $\mathbf{A} = (i, j)$ . Then by rules of matrix inversion,

$$[[\mathfrak{P}^y]_{i,j \in \mathbf{A}}]^{-1}_{1,2} = [[\mathfrak{P}^y]_{i,j \in \mathbf{A}}]^{-1}_{1,1} [\mathfrak{P}^y]_{i,j} ([\mathfrak{P}^y]_{j,j})^{-1}.$$

Because  $[[\mathfrak{P}^y]_{i,j \in \mathbf{A}}]^{-1}_{1,1} = I - \mathfrak{C}_{ii|-(i,j)} \geq I - \mathfrak{C}_{ii|i} = ([\mathfrak{P}^y]_{1,1})^{-1}$ , which is invertible, we have  $\mathfrak{C}_{X_i X_j}^y - \mathfrak{C}_{ij|-(i,j)}^y = 0$  if and only if  $[\mathfrak{P}^y]_{i,j} = 0$ . This completes the proof.  $\square$

**Proof of Theorem 2:** This is a direct result of Lemma S1 and Proposition 3.  $\square$

**Proof of Proposition 5:** By definition,  $\|\hat{\mathfrak{C}}_{XX}^y(d, \epsilon_Y, \epsilon_1)\|_{i,j} = \sup\{\|[\hat{\mathfrak{C}}_{XX}^y(d, \epsilon_Y, \epsilon_1)]_{i,j} f\| : f \in \Omega_{X_i}, \|f\| = 1\} = \sup\{\langle g, [\hat{\mathfrak{C}}_{XX}^y(d, \epsilon_Y, \epsilon_1)]_{i,j} f \rangle : f \in \Omega_{X_i}, g \in \Omega_{X_j}, \|f\| = \|g\| = 1\}$ , which, by (8), can be computed by solving

$$\begin{aligned} & \max_{f \in \Omega_{X_i}, g \in \Omega_{X_j}} \langle g, \hat{\mathfrak{Y}}_{X_i X_j}^y(d, \epsilon_Y) f \rangle \\ & \text{subject to} \quad \langle f, (\hat{\mathfrak{Y}}_{X_i X_i}^y(d, \epsilon_Y) + \epsilon_1 I) f \rangle = \langle g, [\hat{\mathfrak{Y}}_{X_j X_j}^y(d, \epsilon_Y) + \epsilon_1 I] g \rangle = 1. \end{aligned} \quad (\text{S4})$$

Note that, by (6) and (7), for all  $(i, j) \in \mathbf{V} \times \mathbf{V}$ , and  $a, b = 1, \dots, d$ ,

$$[\hat{\mathfrak{M}}_{X_{ij}|Y}(\epsilon_Y)](\hat{\eta}_i^a \otimes \hat{\eta}_j^b) = (\hat{\mathfrak{Y}}_{YY} + \epsilon_Y)^{-1} E_n [\langle X_i \otimes X_j, \hat{\eta}_i^a \otimes \hat{\eta}_j^b \rangle \kappa_Y(\cdot, Y)],$$

which equals to  $E_n[\hat{\alpha}_i^a \hat{\alpha}_j^b c(\cdot)]$  with  $c(\cdot) = (\hat{\mathfrak{Y}}_{YY} + \epsilon_Y)^{-1} \kappa(\cdot, Y)$ . Therefore, for any  $f \in \text{span}(\{\hat{\eta}_i^a\}_{a=1}^d)$  and  $g \in \text{span}(\{\hat{\eta}_j^b\}_{b=1}^d)$  the three inner products in (S4) are:

$$\begin{aligned} \langle f, \hat{\mathfrak{Y}}_{X_i X_j}^y(d, \epsilon_Y) g \rangle &= f_i^\top \mathbf{A} D_y \mathbf{B}^\top g_j \\ \langle f, (\hat{\mathfrak{Y}}_{X_i X_i}^y(d, \epsilon_Y) + \epsilon_1 I) f \rangle &= f_i^\top \mathbf{A} D_y \mathbf{A}^\top f_i + \epsilon_1 \|f\|^2 \\ \langle g, (\hat{\mathfrak{Y}}_{X_j X_j}^y(d, \epsilon_Y) + \epsilon_1 I) g \rangle &= g_j^\top \mathbf{B} D_y \mathbf{B}^\top g_j + \epsilon_1 \|g\|^2, \end{aligned}$$

where  $D_y$  is diagonal with  $[D_y]_{kk} = \langle c(\cdot), \kappa_Y(\cdot, Y^k) \rangle$ ,  $k = 1, \dots, n$ ,  $f_i = (f_i^1, \dots, f_i^n)^\top \in \mathbb{R}^d$  with  $f_i^a = \langle f, \hat{\eta}_i^a \rangle$  for  $a = 1, \dots, d$ , and  $\mathbf{A} \in \mathbb{R}^{d \times n}$  with  $[\mathbf{A}]_{s,t} = \hat{\alpha}_i^{t,s}$ . Similarly, we

define  $g_j = (g_j^1, \dots, g_j^d)^\top$ , with  $g_j^b = \langle g, \hat{\eta}_j^b \rangle$  for  $b = 1, \dots, d$  and  $[\mathbf{B}]_{s,t} = \hat{\alpha}_j^{t,s}$ . Then by Cauchy-Schwarz inequality,  $f_i^\top \mathbf{A} D_y \mathbf{B}^\top g_j \leq (f_i^\top \mathbf{A} D_y \mathbf{A}^\top f_i)^{1/2} (g_j^\top \mathbf{B} D_y \mathbf{B}^\top g_j)^{1/2}$ , and thus

$$\langle g, \hat{\mathfrak{V}}_{X_i X_j}^y(d, \epsilon_Y) f \rangle \leq [\langle f, (\hat{\mathfrak{V}}_{X_i X_i}^y(d, \epsilon_Y) + \epsilon_1 I) f \rangle]^{1/2} [\langle g, (\hat{\mathfrak{V}}_{X_j X_j}^y(d, \epsilon_Y) + \epsilon_1 I) g \rangle],$$

which is no greater than 1 by the constraints in (S4). This completes the proof.  $\square$

**Proof of Proposition 6:** The representation of  $\hat{\mathfrak{V}}_{Y^Y}$  can be derived following Fukumizu et al. (2009). The representation of  $\hat{\mathfrak{V}}_{X_i X_i}$  is

$$\begin{aligned} [\hat{\mathfrak{V}}_{X_i X_i}] &= \left( [\hat{\mathfrak{V}}_{X_i X_i} \mathcal{B}_1(\cdot)], \dots, [\hat{\mathfrak{V}}_{X_i X_i} \mathcal{B}_m(\cdot)] \right) \\ &= n^{-1} \sum_{k=1}^n (\langle X_i^k, \mathcal{B}_1(\cdot) \rangle [X_i], \dots, \langle X_i^k, \mathcal{B}_m(\cdot) \rangle [X_i]) = E_n [X_i] [X_i]^\top, \end{aligned}$$

where the last equality is because  $\langle X_i^k, \mathcal{B}_n(\cdot) \rangle = [X_i^k]^\top e_j$ , where  $e_j$  is a vector of size  $m$  whose  $j$ th element is one and zero otherwise. Similarly we can derive  $[\hat{\mathfrak{V}}_{Y X_{ij}}(f \otimes g)]$ , for  $(f, g) \in \Omega^N \times \Omega^N$ . This completes the proof.  $\square$

**Proof of Proposition 7:** It suffices to show (14), from which the representations in (15) follow immediately. First, by (6) and Proposition 6, the coordinates of  $\hat{\mathfrak{M}}_{X_{ij}|Y}(f \otimes g)$ , for all  $(f, g) \in \Omega^N \times \Omega^N$ , can be written as

$$[\hat{\mathfrak{M}}_{X_{ij}|Y}(f \otimes g)] = (K_Y + \epsilon_Y I_n)^{-1} [([f]^\top [X_i^1] [g]^\top [X_j^1]), \dots, ([f]^\top [X_i^n] [g]^\top [X_j^n])]^\top,$$

for each  $(i, j) \in \mathbb{V} \times \mathbb{V}$ . Therefore, by (13),  $[\hat{\mathfrak{M}}_{X_{ij}|Y}(\epsilon_Y)(\hat{\eta}_i^a \otimes \hat{\eta}_j^b)] \circ (y)$  is equal to

$$\mathcal{B}_Y^\top(y) [\hat{\mathfrak{M}}_{X_{ij}|Y}(\epsilon_Y)(\hat{\eta}_i^a \otimes \hat{\eta}_j^b)] = (\mathbf{a}_i^a)^\top (\text{diag} [(K_Y + \epsilon_Y I_n)^{-1} \mathcal{B}_Y(y)]) \mathbf{a}_j^b,$$

for any  $a, b = 1, \dots, d$ . Then by (7), the proof is completed.  $\square$

For notational simplicity, for two sets  $\mathbf{A}, \mathbf{B}$  and two integers  $A, B$ , we use  $\sum_{a,b}^{\mathbf{A}, \mathbf{B}}$  and  $\sum_{a,b}^{A,B}$  to abbreviate the double sums  $\sum_{a \in \mathbf{A}} \sum_{b \in \mathbf{B}}$  and  $\sum_{a=1}^A \sum_{b=1}^B$ , respectively.

**Proof of Theorem 3:** For (i), by definition, we have,

$$\hat{\mathfrak{V}}_{X_i X_j} - \mathfrak{V}_{X_i X_j} = E_n [X_i \otimes X_j - E(X_i \otimes X_j)].$$

Therefore, by Lemma S3 and (S1), we have the asserted bound if there exists  $c > 0$  such that, for all  $\ell \in \mathbb{N}$ ,

$$E\|X_i \otimes X_j - E(X_i \otimes X_j)\|_{\text{HS}}^\ell \leq c^\ell \ell!. \quad (\text{S5})$$

To bound (S5), we note that,

$$\begin{aligned} & E\|X_i \otimes X_j - E(X_i \otimes X_j)\|_{\text{HS}}^\ell \\ & \leq 2^{\ell-1} \{E[E(\|X_i \otimes X_j\|_{\text{HS}}^\ell | Y)] + E\|E(X_i \otimes X_j | Y)\|_{\text{HS}}^\ell\} \equiv 2^{\ell-1}[E\Lambda_1(Y) + E\Lambda_2(Y)]. \end{aligned}$$

Next we show that both  $\Lambda_1(y)$  and  $\Lambda_2(y)$  can be uniformly bounded for all  $y \in \Omega_Y$ .

For  $\Lambda_1(y)$ , when  $\ell > 1$ , it is equal to

$$E[(\sum_{a,b}^{\mathbb{N}_i, \mathbb{N}_j} \langle X_i \otimes X_j, \eta_i^a \otimes \eta_j^b \rangle_{\text{HS}}^2)^{\ell/2} | y] \leq M_0^\ell \left\{ \sum_{a,b}^{\mathbb{N}_i, \mathbb{N}_j} (\lambda_i^a \lambda_j^b / M_0^2) E[(\xi_i^a)^2 (\xi_j^b)^2 | y]^{\ell/2} \right\},$$

where the inequality is by Jensen's inequality,  $\mathbb{N}_i = \{a \in \mathbb{N} : \lambda_i^a \neq 0\}$ , and  $\xi_i^a = (\lambda_i^a)^{-1/2} \alpha_i^a$ , for all  $a, b$ . Furthermore, when conditioning on  $Y$ ,  $\xi_i^a = (\lambda_i^a)^{-1/2} \alpha_i^a$  is standard normal by Assumption 3. Therefore, due to that  $\sum_{a,b}^{\mathbb{N}_i, \mathbb{N}_j} \lambda_i^a \lambda_j^b \leq (\sum_a^{\mathbb{N}} \lambda_i^a)^2$ , which equals  $E^2\|X_i\|_{\Omega_{X_i}}^2$ , and that for all  $i \in \mathbf{V}$ ,  $E\|X_i\|_{\Omega_{X_i}}^2 \leq M_0$  by Assumption 1, we have  $\Lambda_1(y) \leq (2M_0)^\ell \ell!$ . When  $\ell = 1$ , for any  $y \in \Omega_Y$ ,

$$\Lambda_1(y) \leq E^{1/2}(\|X_i \otimes X_j\|_{\text{HS}}^2 | y) = \left\{ \sum_{a,b}^{\mathbb{N}_i, \mathbb{N}_j} \lambda_i^a \lambda_j^b E[(\xi_i^a)^2 (\xi_j^b)^2 | y] \right\}^{1/2} \leq M_0.$$

Combining the above bounds, we have, for any  $\ell \in \mathbb{N}$  and  $y \in \Omega_Y$ ,  $\Lambda_1(y) \leq (2M_0)^\ell \ell!$ .

For  $\Lambda_2(y)$ , we have

$$\Lambda_2(y) = (\sum_{a,b}^{\mathbb{N}_i, \mathbb{N}_j} E\langle X_i \otimes X_j, \eta_i^a \otimes \eta_j^b \rangle_{\text{HS}}^2)^{\ell/2} \leq (\sum_{a,b}^{\mathbb{N}_i, \mathbb{N}_j} \lambda_i^a \lambda_j^b E[(\xi_i^a)^2 (\xi_j^b)^2 | y])^{\ell/2} \leq M_0^\ell,$$

Combining the bounds for  $\Lambda_1(y)$  and  $\Lambda_2(y)$  leads to (S5), with  $c = 4M_0$ .

For (ii), again by definition, we have,

$$\hat{\mathfrak{Y}}_{Y X_{ij}} - \mathfrak{Y}_{Y X_{ij}} = E_n[\kappa_Y(\cdot, Y) \otimes X_i \otimes X_j - E(\kappa_Y(\cdot, Y) \otimes X_i \otimes X_j)],$$

which implies that, for any  $\ell \in \mathbb{N}$ ,

$$E\|\kappa_Y(\cdot, Y) \otimes X_i \otimes X_j\|_{\text{HS}}^\ell = E[\kappa_Y^{1/2}(Y, Y) \|X_i \otimes X_j\|_{\text{HS}}]^\ell \leq M_Y^{\ell/2} E\|X_i \otimes X_j\|_{\text{HS}}^\ell,$$

where the inequality is by Assumption 1. Moreover, by Jensen's inequality,

$$\|E[\kappa_Y(\cdot, Y) \otimes X_i \otimes X_j]\|_{\text{HS}}^\ell \leq E^{\ell/2}\|\kappa_Y(\cdot, Y) \otimes X_i \otimes X_j\|_{\text{HS}}^2 \leq M_Y^{\ell/2} E^{\ell/2}\|X_i \otimes X_j\|_{\text{HS}}^2.$$

Then following a similar argument as in the proof of (i), we have

$$E\|\kappa_Y(\cdot, Y) \otimes X_i \otimes X_j - E(\kappa_Y(\cdot, Y) \otimes X_i \otimes X_j)\|_{\text{HS}}^\ell \leq (4M_0\sqrt{M_Y})^\ell \ell!,$$

which, again by Lemma S3, leads to the asserted bound.

For (iii), it can be proved by following the proof in Bach (2009, Proposition 13).

For (iv), we have, for any  $t \geq 0$ ,

$$\begin{aligned} P\left(\max_{i,j \in \mathcal{V}} \|\hat{\mathfrak{Y}}_{YX_{ij}} - \mathfrak{Y}_{YX_{ij}}\| > t\right) &\leq \sum_{i,j}^{\mathcal{V},\mathcal{V}} P(\|\hat{\mathfrak{Y}}_{YX_{ij}} - \mathfrak{Y}_{YX_{ij}}\| > t) \\ &\leq C_3 p^2 \exp[-C_4 n(t \wedge t^2)], \end{aligned}$$

where the last inequality is by assertion (i). Hence, by the condition  $\log p/n \rightarrow 0$  as  $n \rightarrow \infty$ , we have,

$$\max_{i,j \in \mathcal{V}} \|\hat{\mathfrak{Y}}_{YX_{ij}} - \mathfrak{Y}_{YX_{ij}}\| = O_P[(\log p/n)^{1/2}].$$

By similar arguments, we can prove (v) and (vi).  $\square$

**Proof of Theorem 4:** First note that,

$$\max_{i,j \in \mathcal{V}} \|\hat{\mathfrak{Y}}_{X_i X_j}^y(d, \epsilon_Y) - \mathfrak{Y}_{X_i X_j}^y(d)\|_{\text{HS}} \leq \Lambda_3^y + \Lambda_4^y,$$

where

$$\begin{aligned} \Lambda_3^y &= \max_{i,j \in \mathcal{V}} \|\sum_{a,b}^{d,d} \{[\hat{\mathfrak{M}}_{X_{ij}|Y}(\epsilon_Y)](\hat{\eta}_i^a \otimes \hat{\eta}_j^b) \circ (y) - E(\alpha_i^a \alpha_j^b | y)\} \hat{\eta}_i^a \otimes \hat{\eta}_j^b\|_{\text{HS}}, \\ \Lambda_4^y &= \max_{i,j \in \mathcal{V}} \|\sum_{a,b}^{d,d} E(\alpha_i^a \alpha_j^b | y) [(\hat{\eta}_i^a - \eta_i^a) \otimes \hat{\eta}_j^b + \eta_i^a \otimes (\hat{\eta}_j^b - \eta_j^b)]\|_{\text{HS}}. \end{aligned}$$

We next derive the bounds of  $\Lambda_3^y$  and  $\Lambda_4^y$ , respectively.

For  $\Lambda_3^y$ , by Proposition 2, it is further bounded by  $\sum_{k=1}^4 \Lambda_{3,k}^y$ , where

$$\begin{aligned} \Lambda_{3,1}^y &= \max_{i,j \in \mathcal{V}} \|\sum_{a,b}^{d,d} \{[\hat{\mathfrak{M}}_{X_{ij}|Y}(\epsilon_Y) - \mathfrak{M}_{X_{ij}|Y}](\eta_i^a \otimes \eta_j^b)\} \circ (y) \hat{\eta}_i^a \otimes \hat{\eta}_j^b\|_{\text{HS}}, \\ \Lambda_{3,2}^y &= \max_{i,j \in \mathcal{V}} \|\sum_{a,b}^{d,d} \{[\hat{\mathfrak{M}}_{X_{ij}|Y}(\epsilon_Y)][(\hat{\eta}_i^a - \eta_i^a) \otimes (\hat{\eta}_j^b - \eta_j^b)]\} \circ (y) \hat{\eta}_i^a \otimes \hat{\eta}_j^b\|_{\text{HS}}, \\ \Lambda_{3,3}^y &= \max_{i,j \in \mathcal{V}} \|\sum_{a,b}^{d,d} \{[\hat{\mathfrak{M}}_{X_{ij}|Y}(\epsilon_Y)][\eta_i^a \otimes (\hat{\eta}_j^b - \eta_j^b)]\} \circ (y) \hat{\eta}_i^a \otimes \hat{\eta}_j^b\|_{\text{HS}}, \\ \Lambda_{3,4}^y &= \max_{i,j \in \mathcal{V}} \|\sum_{a,b}^{d,d} \{[\hat{\mathfrak{M}}_{X_{ij}|Y}(\epsilon_Y)][(\hat{\eta}_i^a - \eta_i^a) \otimes \eta_j^b]\} \circ (y) \hat{\eta}_i^a \otimes \hat{\eta}_j^b\|_{\text{HS}}. \end{aligned}$$

We next derive the bounds of  $\Lambda_{3,k}^y$ ,  $k = 1, 2, 3, 4$ , respectively. For  $\Lambda_{3,1}^y$ ,



$$\begin{aligned}\Lambda_{3,1}^y &\leq \max \left\{ \sum_{a,b}^{d,d} \langle [\hat{\mathfrak{M}}_{X_{ij}|Y}(\epsilon_Y) - \mathfrak{M}_{X_{ij}|Y}](\eta_i^a \otimes \eta_j^b), \kappa_Y(\cdot, y) \rangle : i, j \in \mathcal{V} \right\} \\ &\leq d^2 M_Y^{1/2} \times \max_{i,j \in \mathcal{V}} \|\hat{\mathfrak{M}}_{X_{ij}|Y}(\epsilon_Y) - \mathfrak{M}_{X_{ij}|Y}\|,\end{aligned}$$

where the first inequality is because  $\|\hat{\eta}_i^a\| \|\hat{\eta}_j^b\| = 1$ , for all  $i, j, a, b$ , and the last inequality is by Assumption 1, and that  $\|\eta_i^a \otimes \eta_j^b\|_{\text{HS}} = 1$ . Moreover,

$$\begin{aligned}\max_{i,j \in \mathcal{V}} \|\hat{\mathfrak{M}}_{X_{ij}|Y}(\epsilon_Y) - \mathfrak{M}_{X_{ij}|Y}\| &\leq \max_{i,j \in \mathcal{V}} \|\hat{\mathfrak{W}}_{YY}^{\dagger \epsilon_Y} (\hat{\mathfrak{V}}_{YX_{ij}} - \mathfrak{V}_{YX_{ij}})\| \\ &\quad + \max_{i,j \in \mathcal{V}} \|(\hat{\mathfrak{W}}_{YY}^{\dagger \epsilon_Y} - \mathfrak{W}_{YY}^{\dagger \epsilon_Y}) \mathfrak{V}_{YX_{ij}}\| + \max_{i,j \in \mathcal{V}} \|\mathfrak{W}_{YY}^{\dagger \epsilon_Y} \mathfrak{V}_{YX_{ij}} - \mathfrak{M}_{X_{ij}|Y}\|. \tag{S6}\end{aligned}$$

The first term on the right-hand-side of S6) is no greater than  $\epsilon_Y^{-1} \max_{i,j \in \mathcal{V}} \|\hat{\mathfrak{V}}_{YX_{ij}} - \mathfrak{V}_{YX_{ij}}\|$  because  $\|\hat{\mathfrak{W}}_{YY}^{\dagger \epsilon_Y}\| \leq \epsilon_Y^{-1}$ . The second term is bounded by

$$\begin{aligned}\max_{i,j \in \mathcal{V}} \|(\hat{\mathfrak{W}}_{YY}^{\dagger \epsilon_Y} - \mathfrak{W}_{YY}^{\dagger \epsilon_Y}) \mathfrak{V}_{YX_{ij}}\| &\leq \|\hat{\mathfrak{W}}_{YY}^{\dagger \epsilon_Y}\| \|\hat{\mathfrak{V}}_{YY} - \mathfrak{V}_{YY}\| \times \max_{i,j \in \mathcal{V}} \|\mathfrak{W}_{YY}^{\dagger \epsilon_Y} \mathfrak{V}_{YX_{ij}}\| \\ &\leq \epsilon_Y^{-1} \|\hat{\mathfrak{V}}_{YY} - \mathfrak{V}_{YY}\| \times \max_{i,j \in \mathcal{V}} \|\mathfrak{M}_{X_{ij}|Y}\| \leq c M_Y^\beta \epsilon_Y^{-1} \|\hat{\mathfrak{V}}_{YY} - \mathfrak{V}_{YY}\|,\end{aligned}$$

where the second inequality is because  $\mathfrak{V}_{YX_{ij}} = \mathfrak{V}_{YY} \mathfrak{M}_{X_{ij}|Y}$ , and the last inequality is because, by Assumption 6,  $\|\mathfrak{M}_{X_{ij}|Y}\| \leq \|\mathfrak{V}_{YY}^\beta\| \|\mathfrak{M}_{ij}^0\|$ , and that  $\|\mathfrak{V}_{YY}^\beta\| \leq \|\mathfrak{V}_{YY}\|_{\text{HS}}^\beta \leq E^\beta \|\kappa(\cdot, Y) \otimes \kappa(\cdot, Y)\|_{\text{HS}} \leq M_Y^\beta$ . The last term, by Assumption 6, is bounded by

$$\max_{i,j \in \mathcal{V}} \|\mathfrak{W}_{YY}^{\dagger \epsilon} \mathfrak{V}_{YX_{ij}} - \mathfrak{M}_{X_{ij}|Y}\| = \epsilon_Y \times \max_{i,j \in \mathcal{V}} \|\mathfrak{W}_{YY}^{\dagger \epsilon} \mathfrak{M}_{X_{ij}|Y}\| \leq c \epsilon_Y^\beta,$$

where the inequality is because  $\|\mathfrak{W}_{YY}^{\dagger \epsilon} \mathfrak{V}_{YY}^\beta\| \leq \epsilon_Y^{\beta-1}$ .

Similarly, for  $\Lambda_{3,2}^y$ , by Lemma S4, and that  $\max_{i,j \in \mathcal{V}} \|\mathfrak{V}_{YX_{ij}}\| \leq 2M_0 M_y^{1/2}$ ,

$$\begin{aligned}\Lambda_{3,2}^y &\leq \epsilon_Y^{-1} M_Y^{1/2} \times \max_{i,j \in \mathcal{V}} \left\{ \sum_{a,b}^{d,d} \|\hat{\mathfrak{V}}_{YX_{ij}} [(\hat{\eta}_i^a - \eta_i^a) \otimes (\hat{\eta}_j^b - \eta_j^b)]\| \right\} \\ &\leq 16 \epsilon_Y^{-1} d^2 \kappa_d^{-2} M_Y^{1/2} \times \max_{i \in \mathcal{V}} \|\hat{\mathfrak{V}}_{X_i X_i} - \mathfrak{V}_{X_i X_i}\| \times \max_{j \in \mathcal{V}} \|\hat{\mathfrak{V}}_{X_j X_j} - \mathfrak{V}_{X_j X_j}\| \\ &\quad \times (\max_{i,j \in \mathcal{V}} \|\hat{\mathfrak{V}}_{YX_{ij}} - \mathfrak{V}_{YX_{ij}}\| + 2M_0 M_Y^{1/2}).\end{aligned}$$

Furthermore, both  $\Lambda_{3,3}^y$  and  $\Lambda_{3,4}^y$  are bounded by

$$4 \epsilon_Y^{-1} d^2 \kappa_d^{-1} M_Y^{1/2} \times \max_{j \in \mathcal{V}} \|\hat{\mathfrak{V}}_{X_j X_j} - \mathfrak{V}_{X_j X_j}\| \times (\max_{i,j \in \mathcal{V}} \|\hat{\mathfrak{V}}_{YX_{ij}} - \mathfrak{V}_{YX_{ij}}\| + 2M_0 M_Y^{1/2}).$$

For  $\Lambda_4^y$ , by Proposition 2 and Assumption 6,

$$\begin{aligned}
\Lambda_4^y &\leq 4d^2 \kappa_d^{-1} M_Y^{1/2} \times \max_{i,j \in \mathbf{V}} [\|\mathfrak{M}_{X_{ij}|Y}\| (\|\hat{\mathfrak{W}}_{X_i X_i} - \mathfrak{W}_{X_i X_i}\| + \|\hat{\mathfrak{W}}_{X_j X_j} - \mathfrak{W}_{X_j X_j}\|)] \\
&\leq 4c M_Y^{1/2+\beta} d^2 \kappa_d^{-1} (\max_{i \in \mathbf{V}} \|\hat{\mathfrak{W}}_{X_i X_i} - \mathfrak{W}_{X_i X_i}\| + \max_{j \in \mathbf{V}} \|\hat{\mathfrak{W}}_{X_j X_j} - \mathfrak{W}_{X_j X_j}\|).
\end{aligned}$$

Combining the bounds of  $\Lambda_{3,1}^y$  to  $\Lambda_{3,4}^y$ , and  $\Lambda_4^y$ , and applying the results in Theorem 3(iv) to (vi), we have

$$\begin{aligned}
&\max_{i,j \in \mathbf{V}} \|\hat{\mathfrak{W}}_{X_i X_j}^y(d, \epsilon_Y) - \mathfrak{W}_{X_i X_j}^y(d)\|_{\text{HS}} \\
&= O_P\{d^2 [\epsilon_Y^{-1} (\log p/n)^{1/2} + \epsilon_Y^{-1} n^{-1/2} + \epsilon_Y^\beta]\} + O_P\{d^2 \epsilon_Y^{-1} \kappa_d^{-2} [(\log p/n)^{3/2} + \log p/n]\} \\
&\quad + O_p\{d^2 \epsilon_Y^{-1} \kappa_d^{-1} [\log p/n + (\log p/n)^{1/2}]\} + O_P[d^2 \kappa_d^{-1} (\log p/n)^{1/2}].
\end{aligned}$$

By the conditions  $\epsilon_Y \prec 1$ ,  $(\log p/n) \prec \kappa_d^2$ , we can eliminate the terms with smaller order. This then completes the proof.  $\square$

**Proof of Lemma 1:** We first note that,

$$\max_{i,j \in \mathbf{V}} \|[\hat{\mathfrak{C}}_{XX}^y(d, \epsilon_Y, \epsilon_1)]_{i,j} - [\mathfrak{C}_{XX}^y(d, \epsilon_1)]_{i,j}\|_{\text{HS}} \leq \Lambda_5^y + \Lambda_6^y + \Lambda_7^y,$$

where

$$\begin{aligned}
\Lambda_5^y &= \max_{i,j \in \mathbf{V}} \|[(\hat{\Sigma}_1^{\dagger \epsilon_1})^{1/2} - (\Sigma_1^{\dagger \epsilon_1})^{1/2}] \hat{\Sigma}_2 (\hat{\Sigma}_3^{\dagger \epsilon_1})^{1/2}\|_{\text{HS}}, \\
\Lambda_6^y &= \max_{i,j \in \mathbf{V}} \|(\Sigma_1^{\dagger \epsilon_1})^{1/2} (\hat{\Sigma}_2 - \Sigma_2) (\hat{\Sigma}_3^{\dagger \epsilon_1})^{1/2}\|_{\text{HS}}, \\
\Lambda_7^y &= \max_{i,j \in \mathbf{V}} \|(\Sigma_1^{\dagger \epsilon_1})^{1/2} \Sigma_2 [(\hat{\Sigma}_3^{\dagger \epsilon_1})^{1/2} - (\Sigma_3^{\dagger \epsilon_1})^{1/2}]\|_{\text{HS}},
\end{aligned}$$

$\Sigma_1 = \mathfrak{W}_{X_i X_i}^y(d)$ ,  $\hat{\Sigma}_1 = \hat{\mathfrak{W}}_{X_i X_i}^y(d, \epsilon_Y)$ ,  $\Sigma_2 = \mathfrak{W}_{X_i X_j}^y(d)$ ,  $\hat{\Sigma}_2 = \hat{\mathfrak{W}}_{X_i X_j}^y(d, \epsilon_Y)$ ,  $\Sigma_3 = \mathfrak{W}_{X_j X_j}^y(d)$ , and  $\hat{\Sigma}_3 = \hat{\mathfrak{W}}_{X_j X_j}^y(d, \epsilon_Y)$ . We next derive the bounds of  $\Lambda_5^y$ ,  $\Lambda_6^y$ , and  $\Lambda_7^y$ , respectively.

For  $\Lambda_5^y$ , we have that, for any  $(i, j) \in \mathbf{V} \times \mathbf{V}$ ,

$$\begin{aligned}
\|[(\hat{\Sigma}_1^{\dagger \epsilon_1})^{1/2} - (\Sigma_1^{\dagger \epsilon_1})^{1/2}] \hat{\Sigma}_2 (\hat{\Sigma}_3^{\dagger \epsilon_1})^{1/2}\|_{\text{HS}} &\leq \left\{ \|(\Sigma_1^{\dagger \epsilon_1})^{1/2} [(\Sigma_1^{\dagger \epsilon_1})^{-3/2} - (\hat{\Sigma}_1^{\dagger \epsilon_1})^{-3/2}] \hat{\Sigma}_1^{\dagger \epsilon_1}\|_{\text{HS}} \right. \\
&\quad \left. + \|(\Sigma_1 - \hat{\Sigma}_1) \hat{\Sigma}_1^{\dagger \epsilon_1}\|_{\text{HS}} \right\} \times \|(\hat{\Sigma}_1^{\dagger \epsilon_1})^{1/2} \hat{\Sigma}_2 (\hat{\Sigma}_3^{\dagger \epsilon_1})^{1/2}\|. \tag{S7}
\end{aligned}$$

There are three norms in (S7). The first norm is bounded by  $3\epsilon_1^{-3/2} (\|\hat{\Sigma}_1 - \Sigma_1\| + M_0 + \epsilon_1) \|\hat{\Sigma}_1 - \Sigma_1\|_{\text{HS}}$ , because  $\|(\Sigma_1^{\dagger \epsilon_1})^{-1/2}\| + \|(\hat{\Sigma}_1^{\dagger \epsilon_1})^{-1/2}\| \leq [\|\hat{\Sigma}_1 - \Sigma_1\| + \|(\Sigma_1^{\dagger \epsilon_1})^{-1}\|]^{1/2}$ , and that  $\|(\Sigma_1^{\dagger \epsilon_1})^{-1}\| = \|\mathfrak{W}_{X_i X_i}^y(d)\| + \epsilon_1 \leq \text{tr}(\mathfrak{W}_{X_i X_i}^y(d)) + \epsilon_1 \leq M_0 + \epsilon_1$  by Assumption 1. The second norm is in a smaller order than the first norm, and thus can be ignored. The third norm is bounded by 1 by Proposition 5. Therefore,

$$\Lambda_5^y \preceq \epsilon_1^{-3/2} [\max_{i \in \mathbf{V}} \|\hat{\mathfrak{Y}}_{X_i X_i}^y(d, \epsilon_Y) - \mathfrak{Y}_{X_i X_i}^y(d)\|_{\text{HS}}^2 + \max_{i \in \mathbf{V}} \|\hat{\mathfrak{Y}}_{X_i X_i}^y(d, \epsilon_Y) - \mathfrak{Y}_{X_i X_i}^y(d)\|_{\text{HS}}],$$

whose order of magnitude is  $O_P[\epsilon_1^{-3/2}\{d^2 \epsilon_Y^{-1} \kappa_d^{-1} (\log p/n)^{1/2} + d^2 \epsilon_Y^\beta\}]$  by the condition that  $d^2 \epsilon_Y^{-1} \kappa_d^{-1} (\log p/n)^{1/2} + d^2 \epsilon_Y^\beta \prec 1$ .

For  $\Lambda_6^y$  and  $\Lambda_7^y$ , following a similar argument, we have

$$\Lambda_6^y + \Lambda_7^y = O_P[\epsilon_1^{-3/2}\{d^2 \epsilon_Y^{-1} \kappa_d^{-1} (\log p/n)^{1/2} + d^2 \epsilon_Y^\beta\}].$$

Combining the bounds of  $\Lambda_5^y$ ,  $\Lambda_6^y$ , and  $\Lambda_7^y$  leads to the asserted rate.  $\square$

**Proof of Lemma 2:** Let  $[\mathfrak{C}_{XX}^y(\epsilon_1)]_{i,j} = ([\mathfrak{D}_X^y]_{i,i})^{\dagger \epsilon_1} \mathfrak{Y}_{X_i X_j}^y([\mathfrak{D}_X^y]_{j,j})^{\dagger \epsilon_1}$  for  $(i, j) \in \mathbf{V} \times \mathbf{V}$  with  $i \neq j$ , and  $\max_{i,j \in \mathbf{V}^0}$  be the maximum over all  $(i, j) \in \mathbf{V} \times \mathbf{V}$  with  $i \neq j$ . Then,

$$\max_{i,j \in \mathbf{V}^0} \|[\mathfrak{C}_{XX}^y(d, \epsilon_1)]_{i,j} - [\mathfrak{C}_{XX}^y(\epsilon_1)]_{i,j}\|_{\text{HS}} \leq \Lambda_8^y + \Lambda_9^y,$$

where

$$\Lambda_8^y = \max_{i,j \in \mathbf{V}^0} \|[\mathfrak{C}_{XX}^y(d, \epsilon_1)]_{i,j} - [\mathfrak{C}_{XX}^y(\epsilon_1)]_{i,j}\|_{\text{HS}},$$

$$\Lambda_9^y = \max_{i,j \in \mathbf{V}^0} \|[\mathfrak{C}_{XX}^y(\epsilon_1)]_{i,j} - [\mathfrak{C}_{XX}^y(\epsilon_1)]_{i,j}\|_{\text{HS}}.$$

We next derive the bounds of  $\Lambda_8^y$  and  $\Lambda_9^y$ , respectively.

For  $\Lambda_8^y$ , following a similar argument as the proof in Lemma 1, we have,

$$\begin{aligned} \Lambda_8^y &\preceq \epsilon_1^{-2/3} [\max_{i \in \mathbf{V}} \|\mathfrak{Y}_{X_i X_i}^y(d) - \mathfrak{Y}_{X_i X_i}^y\|_{\text{HS}} + \max_{j \in \mathbf{V}} \|\mathfrak{Y}_{X_j X_j}^y(d) - \mathfrak{Y}_{X_j X_j}^y\|_{\text{HS}}] \\ &\quad + \epsilon_1^{-1} \max_{i,j \in \mathbf{V}^0} \|\mathfrak{Y}_{X_i X_j}^y(d) - \mathfrak{Y}_{X_i X_j}^y\|_{\text{HS}}. \end{aligned}$$

Moreover, by Assumption 7, we have,

$$\begin{aligned} \max_{i,j \in \mathbf{V}^0} \|\mathfrak{Y}_{X_i X_j}^y(d) - \mathfrak{Y}_{X_i X_j}^y\|_{\text{HS}} &= \max_{i,j \in \mathbf{V}^0} \|\sum_{a,b}^{\mathbf{N} \setminus d, \mathbf{N} \setminus d} E(\alpha_i^a \alpha_j^b | y) (\eta_i^a \otimes \eta_j^b)\|_{\text{HS}} \\ &\leq \max_{i,j \in \mathbf{V}^0} \{\sum_{a,b}^{\mathbf{N} \setminus d, \mathbf{N} \setminus d} E[(\alpha_i^a)^2 | y] E[(\alpha_j^b)^2 | y]\}^{1/2} = O(d^{-\gamma_y}). \end{aligned}$$

Therefore,  $\Lambda_8^y = O(\epsilon_1^{-3/2} d^{-\gamma_y})$ .

For  $\Lambda_9^y$ , by direct calculation, we have,

$$(\Lambda_9^y)^2 = \max_{i,j \in \mathbf{V}^0} \|[\mathfrak{C}_{XX}^y(\epsilon_1)]_{i,j} - [\mathfrak{C}_{XX}^y(\epsilon_1)]_{i,j}\|_{\text{HS}}^2 \leq \max_{i,j \in \mathbf{V}^0} \sum_{a,b \in \mathbf{N}} [\Delta_{i,j}^{y,a,b} (\rho_{i,j}^{y,a,b})^2],$$

where  $\Delta_{i,j}^{y,a,b} = 2\lambda_i^{y,a} \lambda_j^{y,b} + \epsilon_1(\lambda_i^{y,a} + \lambda_j^{y,b}) + \epsilon_1^2 - 2[(\lambda_i^{y,a} \lambda_j^{y,b}) (\lambda_i^{y,a} \lambda_j^{y,b} + \epsilon_1(\lambda_i^{y,a} + \lambda_j^{y,b}) + \epsilon_1^2)]^{1/2}$ .

It is further bounded by  $2\epsilon_1(\max_{i \in \mathcal{V}} \|\mathfrak{Y}_{X_i X_i}^y\|) + \epsilon_1^2$ . Therefore, by Assumption 4, we have  $\Lambda_9^y = O(\epsilon^{1/2})$ .

The proof is completed by combining the bounds of  $\Lambda_8^y$  and  $\Lambda_9^y$ .  $\square$

**Proof of Lemma 3:** By Lemma S5,  $\|\hat{\mathfrak{P}}^y(d, \epsilon_Y, \epsilon_1, \epsilon_2) - \mathfrak{P}^y(\epsilon_2)\|_{\text{HS}}$  is bounded by

$$\begin{aligned} & \|\hat{\mathfrak{C}}_{XX}^y(d, \epsilon_Y, \epsilon_1) - \mathfrak{C}_{XX}^y\|_{\text{HS}} \|\mathfrak{P}^y(\epsilon_2)\| \\ & \leq \epsilon_2^{-1} \|\hat{\mathfrak{C}}_{XX}^y(d, \epsilon_Y, \epsilon_1) - \mathfrak{C}_{XX}^y\|_{\text{HS}} \leq \epsilon_2^{-1} p \times \max_{i,j \in \mathcal{V}} \|[\hat{\mathfrak{C}}_{XX}^y(d, \epsilon_Y, \epsilon_1)]_{i,j} - \mathfrak{C}_{X_i X_j}^y\|_{\text{HS}}. \end{aligned}$$

By Theorem 5, we then have the asserted rate.  $\square$

**Proof of Lemma 4:** Note that  $[\mathfrak{P}^y]_{\mathbf{A}, \mathbf{A}} = (\mathfrak{C}_{X_{\mathbf{A}} X_{\mathbf{A}} | X_{\mathbf{A}^c}}^y)^{-1}$  with  $\mathbf{A} = \{i, j\}$ . By the rule of matrix inversion, for any distinct pair  $(i, j) \in \mathcal{V} \times \mathcal{V}$ ,

$$[\mathfrak{P}^y]_{i,j} = -(\mathfrak{C}_{X_i X_i | X_{-(i,j)}}^y)^{-1} \mathfrak{C}_{X_i X_j | X_{-(i,j)}}^y (\mathfrak{C}_{X_j X_j | X_{-j}}^y)^{-1} \equiv -\Psi_1^{-1} \Psi_2 \Psi_3^{-1}.$$

Let  $\mathfrak{C}_{X_i X_j | X_{-(i,j)}}^y(\epsilon_2) = \mathfrak{C}_{X_i X_j}^y + \epsilon_2 \delta_{ij} I - \mathfrak{C}_{X_i X_{-(i,j)}}^y (\mathfrak{C}_{X_{-(i,j)} X_{-(i,j)}}^y + \epsilon_2 I)^{-1} \mathfrak{C}_{X_{-(i,j)} X_j}^y$ . Then,

$$\begin{aligned} [\mathfrak{P}^y(\epsilon_2)]_{i,j} &= -[\mathfrak{C}_{X_i X_i | X_{-(i,j)}}^y(\epsilon_2)]^{-1} \mathfrak{C}_{X_i X_j | X_{-(i,j)}}^y(\epsilon_2) [\mathfrak{C}_{X_j X_j | X_{-j}}^y(\epsilon_2)]^{-1} \\ &\equiv [\Psi_1(\epsilon_2)]^{-1} [\Psi_2(\epsilon_2)] [\Psi_3(\epsilon_2)]^{-1}. \end{aligned}$$

This further implies that

$$\max_{i,j \in \mathcal{V}^0} \|[\mathfrak{P}^y(\epsilon_2)]_{i,j} - \mathfrak{P}_{i,j}^y\|_{\text{HS}} \leq \Delta_1 + \Delta_2 + \Delta_3,$$

where

$$\begin{aligned} \Delta_1 &= \max_{i,j \in \mathcal{V}^0} \| \{ [\Psi_1(\epsilon_2)]^{-1} - \Psi_1^{-1} \} \Psi_2(\epsilon_2) [\Psi_3(\epsilon_2)]^{-1} \|_{\text{HS}}, \\ \Delta_2 &= \max_{i,j \in \mathcal{V}^0} \| \Psi_1^{-1} [\Psi_2(\epsilon_2) - \Psi_2] [\Psi_3(\epsilon_2)]^{-1} \|_{\text{HS}}, \\ \Delta_3 &= \max_{i,j \in \mathcal{V}^0} \| \Psi_1^{-1} \Psi_2 \{ [\Psi_3(\epsilon_2)]^{-1} - \Psi_3^{-1} \} \|_{\text{HS}}. \end{aligned}$$

We next derive the bounds of  $\Delta_1$ ,  $\Delta_2$ , and  $\Delta_3$ , respectively.

For  $\Delta_1$ , first note that  $\|[\Psi_1(\epsilon_2)]^{-1} - \Psi_1^{-1}\|$  is bounded by

$$\begin{aligned} \|[\Psi_1(\epsilon_2)]^{-1} - \Psi_1^{-1}\| &\leq \|\Psi_1(\epsilon_2)\|^{-1} \|\Psi_1\|^{-1} \\ &\times \|\epsilon_2 I - \mathfrak{C}_{X_i X_{-(i,j)}}^y \{ [\mathfrak{C}_{X_{-(i,j)} X_{-(i,j)}}^y + \epsilon_2 I]^{-1} - [\mathfrak{C}_{X_{-(i,j)} X_{-(i,j)}}^y]^{-1} \} \mathfrak{C}_{X_{-(i,j)} X_i}^y\|. \end{aligned} \quad (\text{S8})$$

Moreover, because  $\mathfrak{C}_{X_i X_i | X_{-i}}^y \leq \Psi_1(\epsilon_2)$  and  $\|(\mathfrak{C}_{X_i X_i | X_{-i}}^y)^{-1}\| = \|[\mathfrak{P}^y]_{i,i}\| \leq \|\mathfrak{P}^y\| < \infty$ , the first two norms on the right of (S8) are bounded. The third norm is in a smaller

order than  $\epsilon_2$  because  $(\mathfrak{C}_{X_{-(i,j)}X_{-(i,j)}}^y)^{-1} - (\mathfrak{C}_{X_{-(i,j)}X_{-(i,j)}}^y + \epsilon_2 I)^{-1} \leq c_{\min} \epsilon (\mathfrak{C}_{X_{-(i,j)}X_{-(i,j)}}^y)^{-1}$  by Proposition S3, and that  $\mathfrak{C}_{X_i X_{-(i,j)}}^y (\mathfrak{C}_{X_{-(i,j)}X_{-(i,j)}}^y)^{-1} \mathfrak{C}_{X_{-(i,j)}X_i}^y \leq I$ . Therefore, we have  $\max_{i,j \in \mathcal{V}^0} \|[\Psi_1(\epsilon_2)]^{-1} - \Psi_1^{-1}\| \preceq \epsilon_2$ . Because  $\Psi_3(\epsilon_2) \geq \mathfrak{C}_{X_j X_j | X_{-j}}^y$ ,  $\|\Phi_3(\epsilon_2)\|$  is also bounded. Moreover,

$$\begin{aligned} & \max_{i,j \in \mathcal{V}^0} \|\mathfrak{C}_{X_i X_{-(i,j)}}^y [\mathfrak{C}_{X_{-(i,j)}X_{-(i,j)}}^y + \epsilon_2 I]^{-1} \mathfrak{C}_{X_{-(i,j)}X_j}^y\|_{\text{HS}} \\ & \leq \max_{i,j \in \mathcal{V}^0} \|\mathfrak{C}_{X_i X_{-(i,j)}}^y [\mathfrak{C}_{X_{-(i,j)}X_{-(i,j)}}^y]^{-1} \mathfrak{C}_{X_{-(i,j)}X_j}^y\|_{\text{HS}}, \end{aligned}$$

which is finite by Proposition S2 and Assumption 8. This implies  $\|\Psi_2(\epsilon_2)\|_{\text{HS}}$  is uniformly bounded. Therefore, we have  $\Delta_1 \preceq \epsilon_2$ .

For  $\Delta_2$ , it suffices to show that  $\|\Psi_2(\epsilon_2) - \Psi_2\|_{\text{HS}}$  is uniformly bounded. Following a similar argument as that for  $\Delta_1$ , we obtain that,

$$\max_{i,j \in \mathcal{V}^0} \|\Psi_2(\epsilon_2) - \Psi_2\|_{\text{HS}} \leq c_{\min} \epsilon_2 \times \max_{i,j \in \mathcal{V}^0} \|\mathfrak{C}_{X_i X_{-(i,j)}}^y [\mathfrak{C}_{X_{-(i,j)}X_{-(i,j)}}^y]^{-1} \mathfrak{C}_{X_{-(i,j)}X_j}^y\|_{\text{HS}} \preceq \epsilon_2,$$

which implies that  $\Delta_2 \preceq \epsilon_2$ .

For  $\Delta_3$ , we can similarly show that  $\Delta_3 \preceq \epsilon_2$ .

The proof is completed by combining the orders of  $\Delta_1$ ,  $\Delta_2$ , and  $\Delta_3$ .  $\square$

**Proof of Theorem 6:** The first assertion follows Lemmas 3 and 4. For the second assertion, we have, by Lemma S1,  $\mathbf{E}^y = \{(i, j) : i \neq j, \|[\mathfrak{P}^y]_{i,j}\|_{\text{HS}} > 0\}$ . Furthermore,

$$\begin{aligned} & P \left[ \hat{\mathbf{E}}_{\text{CPO}}^y(d, \epsilon_Y, \epsilon_1, \epsilon_2, \rho_{\text{CPO}}) \neq \mathbf{E}^y \right] \\ & \leq P \left\{ \|[\hat{\mathfrak{P}}^y(d, \epsilon_Y, \epsilon_1, \epsilon_2)]_{i,j}\|_{\text{HS}} > \rho_{\text{CPO}} \text{ and } [\mathfrak{P}^y]_{i,j} = 0, \text{ for some } i, j \in \mathcal{V} \right\} \\ & \quad + P \left\{ \|[\hat{\mathfrak{P}}^y(d, \epsilon_Y, \epsilon_1, \epsilon_2)]_{i,j}\|_{\text{HS}} \leq \rho_{\text{CPO}} \text{ and } [\mathfrak{P}^y]_{i,j} \neq 0, \text{ for some } i, j \in \mathcal{V} \right\}, \end{aligned}$$

where both terms are bounded by  $P\{\max_{i,j \in \mathcal{V}^0} \|[\hat{\mathfrak{P}}^y(d, \epsilon_Y, \epsilon_1, \epsilon_2)]_{i,j} - [\mathfrak{P}^y]_{i,j}\|_{\text{HS}} \geq \rho_{\text{CPO}}\}$ , which tends to zero as  $n \rightarrow \infty$  by the condition that  $\rho_{\text{CPO}} \succ [\epsilon_2 + \epsilon_2^{-1} p \delta_y]$ . This completes the proof.  $\square$

### S.3 Discussion of Assumptions 4 and 5

We discuss Assumptions 4 and 5 in more detail. Assumption 4 characterizes the level of smoothness for the underlying distributions of the random functions. We first note

that the quantity  $\sum_{a,b}^{\mathbb{N}_i^y, \mathbb{N}_j^y} (\rho_{i,j}^{y,a,b})^2$  in (5) is zero if and only if  $\rho_{i,j}^{y,a,b} = 0$ , for  $a \in \mathbb{N}_i^y$  and  $b \in \mathbb{N}_j^y$ , which is equivalent to the conditional independence between  $X_i$  and  $X_j$  given  $Y$ . We next provide an equivalent condition of Assumption 4. Its proof immediately follows by the definition of conditional correlation operator and is omitted.

**Proposition S1** *Suppose Assumptions 1 and 2 hold. For each  $(i, j) \in \mathbb{V} \times \mathbb{V}$ ,  $i \neq j$ , and  $y \in \Omega_Y$ , if  $\mathfrak{C}_{i,j}^{y,0} = \sum_{a,b \in \mathbb{N}} \rho^{y,a,b} (\eta_i^{y,a} \otimes \eta_j^{y,b})$ , then*

$$(i) \quad \mathfrak{C}_{X_i X_j}^y = (\mathfrak{V}_{X_i X_i}^y)^{1/2} \mathfrak{C}_{i,j}^{y,0} (\mathfrak{V}_{X_j X_j}^y)^{1/2};$$

$$(ii) \quad (5) \text{ holds if and only if } \max_{i,j \in \mathbb{V}, i \neq j} \|\mathfrak{C}_{i,j}^{y,0}\|_{\text{HS}}^2 \leq c_1.$$

We note that, in the context of unconditional functional graphical model, Li and Solea (2018, Assumption 4) has introduced a similar condition,

$$\mathfrak{C}_{X_i X_j} = (\mathfrak{V}_{X_i X_i})^{1/2+\beta} \mathfrak{C}_{i,j}^0 (\mathfrak{V}_{X_j X_j})^{1/2+\beta}, \quad (\text{S9})$$

where  $\beta > 0$ , and  $\mathfrak{C}_{X_i X_j}$ ,  $\mathfrak{V}_{X_i X_i}$ ,  $\mathfrak{C}_{i,j}^0$ , and  $\mathfrak{V}_{X_j X_j}$  are the unconditional counterparts of  $\mathfrak{C}_{X_i X_j}^y$ ,  $\mathfrak{V}_{X_i X_i}^y$ ,  $\mathfrak{C}_{i,j}^{y,0}$ , and  $\mathfrak{V}_{X_j X_j}^y$ , respectively. Proposition S1(i) and condition (S9) are imposed in a similar fashion. However, Assumption 4 is more transparent than (S9), because it is based on the variances and covariances of the eigenfunctions of the conditional covariance operators.

To provide some further insight to Assumption 4, let  $\tau_{i,j}^{y,a,b} = \text{var}^{-1/2}(\langle \eta_i^{y,a}, X_i \rangle | y) \text{cov}(\langle \eta_i^{y,a}, X_i \rangle, \langle \eta_j^{y,b}, X_j \rangle | y) \text{var}^{-1/2}(\langle \eta_j^{y,b}, X_j \rangle | y)$ , which is the correlation between  $\langle \eta_i^{y,a}, X_i \rangle$  and  $\langle \eta_j^{y,b}, X_j \rangle$  given  $Y = y$ . Assumption 4 then implies that both quantities  $\sum_{a,b \in \mathbb{N}} (\tau_{i,j}^{y,a,b})^2 (\lambda_i^{y,a})^{-1} (\lambda_j^{y,b})^{-1}$  and  $\sum_{a \in \mathbb{N}} \lambda_i^{y,a}$  need to be uniformly bounded. For example, if  $\lambda_i^{y,a} \asymp a^{-\alpha}$  and  $\tau_{i,j}^{y,a,b} \asymp (ab)^{-(\beta+\alpha)/2}$  with  $\alpha, \beta > 1$ , then Assumption 4 holds. Note that because  $\lambda_i^{y,a}$  vanishes fast,  $\tau_{i,j}^{y,a,b}$  needs to vanish faster, which implies that the conditional dependency between  $X_i$  and  $X_j$  given  $Y$  needs to be adequately concentrated on the leading eigenfunctions of  $\mathfrak{V}_{X_i X_i}^y$  and  $\mathfrak{V}_{X_j X_j}^y$ .

Under Assumption 4, the next proposition shows that  $\mathfrak{C}_{X_i X_j}^y$  is Hilbert-Schmidt, and thus it is compact.

**Proposition S2** *If Assumptions 1 to 4 hold, then there exists a constant  $c_{\text{HS}}$ , such that  $\max_{i,j \in \mathbb{V}, i \neq j} \|\mathfrak{C}_{X_i X_j}^y\|_{\text{HS}} \leq c_{\text{HS}}$ .*

PROOF. By definition,  $\|\mathfrak{C}_{X_i X_j}^y\|_{\text{HS}}^2$  is equal to

$$\sum_{a,b}^{\mathbb{N}_i^y, \mathbb{N}_j^y} \langle \tilde{\eta}_i^{y,a}, \mathfrak{Y}_{X_i X_j}^y \tilde{\eta}_j^{y,b} \rangle^2 = \sum_{a,b}^{\mathbb{N}_i^y, \mathbb{N}_j^y} E^2(\langle \tilde{\eta}_i^{y,a}, X_i \rangle \langle \tilde{\eta}_j^{y,b}, X_j \rangle | y),$$

where  $\tilde{\eta}_i^{y,a} = \eta_i^{y,a} / (\lambda_i^{y,a})^{1/2}$  for any  $y \in \Omega_Y$  and  $(i, j) \in \mathbb{V} \times \mathbb{V}$ . By Assumptions 3, the right-hand side of the above quantity is further bounded by

$$\sum_{a,b}^{\mathbb{N}_i^y, \mathbb{N}_j^y} \text{cov}^2(\langle \tilde{\eta}_i^{y,a}, X_i \rangle \langle \tilde{\eta}_j^{y,b}, X_j \rangle | y) = \sum_{a,b}^{\mathbb{N}_i^y, \mathbb{N}_j^y} [\lambda_i^{y,a} \lambda_j^{y,b} (\rho_{i,j}^{y,a,b})^2] \leq c_1 (\sum_{a,b \in \mathbb{N}} \lambda_i^{y,a} \lambda_j^{y,b}),$$

where  $(\rho_{i,j}^{y,a,b})^2$  is defined in (5), and the last inequality is by Assumption 4. Note that the last term in the above relation is  $c_1 (\sum_{a \in \mathbb{N}} \lambda_i^{y,a})^2 = c_1 \text{tr}^2(\mathfrak{Y}_{X_i X_i}^y)$  which is no greater than  $c_1 M_0^2$  by Assumption 1.  $\square$

Assumption 5 is to prevent the existence of a constant function consisting of a linear combination of non-constant functions. To see this, for  $f = (f_1, \dots, f_p)^\top \in \Omega_X$ , we have that,  $\ker(\mathfrak{Y}_{X X}^y) = \{f \in \Omega_X : E[(\sum_{i=1}^p \langle f_i, X_i \rangle_{\Omega_{X_i}})^2 | Y] = 0\}$ , which is further equal to  $\{f \in \Omega_X : \sum_{i=1}^p \langle f_i, X_i \rangle_{\Omega_{X_i}} = 0 \text{ almost surely}\}$ .

Under Assumptions 4 and 5, the next proposition shows that  $\mathfrak{C}_{X X}^y$  is lower bounded by a strictly positive constant, which immediately implies that  $\mathfrak{C}_{X X}^y$  is invertible.

**Proposition S3** *If Assumptions 1 to 5 hold, then there exists  $c_{\min} > 0$ , such that  $c_{\min} I \leq \mathfrak{C}_{X X}^y$ , where  $I$  is the identity mapping.*

PROOF. Note that  $\mathfrak{C}_{X X}^y$  can be expressed as  $\mathfrak{C}_{X X}^y = I + \mathfrak{C}'$ , with  $\mathfrak{C}'$  being a compact operator. Therefore, by Bach (2008), if  $\mathfrak{C}_{X X}^y$  is invertible, then there exists  $c > 0$  such that  $\mathfrak{C}_{X X}^y$  must be bounded below by  $cI$ . Moreover, by Assumption 5,  $\mathfrak{Y}_{X X}^y$  is invertible, which implies that  $\mathfrak{C}_{X X}^y$  is also invertible. This completes the proof.  $\square$

## S.4 Estimation via conditional partial correlation operator

As an alternative approach, we briefly discuss how to estimate the graph  $\mathbf{E}^y$  via the conditional partial correlation operator  $\mathfrak{R}_{X_i X_j | X_{-(i,j)}}^y$ . First, we estimate  $\mathfrak{Y}_{X_i X_j | X_{-(i,j)}}^y$  by, for each  $(i, j) \in \mathbb{V} \times \mathbb{V}$ ,

$$\begin{aligned} \hat{\mathfrak{Y}}_{X_i X_j | X_{-(i,j)}}^y(d, \epsilon_Y, \epsilon_3) &= \hat{\mathfrak{Y}}_{X_i X_j}^y(d, \epsilon_Y) - \hat{\mathfrak{Y}}_{X_i X_{-(i,j)}}^y(d, \epsilon_Y) \\ &\quad \times \left[ \hat{\mathfrak{Y}}_{X_{-(i,j)} X_{-(i,j)}}^y(d, \epsilon_Y) + \epsilon_3 I \right]^{-1} \hat{\mathfrak{Y}}_{X_{-(i,j)} X_j}^y(d, \epsilon_Y), \end{aligned}$$

where  $\epsilon_3 > 0$  is the ridge parameter. By Proposition 3, we estimate  $\mathfrak{R}_{X_i X_j | X_{-(i,j)}}^y$  by

$$\begin{aligned} \hat{\mathfrak{R}}_{X_i X_j | X_{-(i,j)}}^y(d, \epsilon_Y, \epsilon_3, \epsilon_4) &= (\hat{\mathfrak{Y}}_{X_i X_i | X_{-(i,j)}}^y(d, \epsilon_Y, \epsilon_3) + \epsilon_4 I)^{-1/2} \\ &\quad \times \hat{\mathfrak{Y}}_{X_i X_j | X_{-(i,j)}}^y(d, \epsilon_Y, \epsilon_3) (\hat{\mathfrak{Y}}_{X_i X_i | X_{-(i,j)}}^y(d, \epsilon_Y, \epsilon_3) + \epsilon_4 I)^{-1/2}, \end{aligned}$$

where  $\epsilon_4 > 0$  is a ridge parameter to enable the inversion of  $\hat{\mathfrak{Y}}_{X_i X_i | X_{-(i,j)}}^y(d, \epsilon_Y, \epsilon_3)$  and  $\hat{\mathfrak{Y}}_{X_j X_j | X_{-(i,j)}}^y(d, \epsilon_Y, \epsilon_3)$ . Then, for each  $y \in \Omega_Y$ , we can estimate the graph  $\mathbf{E}^y$  by

$$\hat{\mathbf{E}}_{\text{CPCO}}^y(d, \epsilon_Y, \epsilon_3, \epsilon_4, \rho_{\text{CPCO}}) = \{(i, j) \in \mathbf{V} \times \mathbf{V} : \|\hat{\mathfrak{R}}_{X_i X_j | X_{-(i,j)}}^y(d, \epsilon_Y, \epsilon_3, \epsilon_4)\|_{\text{HS}} > \rho_{\text{CPCO}}, i \neq j\},$$

where  $\rho_{\text{CPCO}} > 0$  is the thresholding parameter.

At the sample level, we estimate the coordinates of  $\mathfrak{R}_{X_i X_j | X_{-(i,j)}}^y$  as

$$\begin{aligned} \mathcal{B}_i^* [\hat{\mathfrak{Y}}_{X_i X_j | X_{-(i,j)}}^y(d, \epsilon_Y, \epsilon_3)]_{\mathcal{B}_j^*} &= [M(y)]_{i,j} - [M(y)]_{i,-(i,j)} \times \\ &\quad ([M(y)]_{-(i,j),-(i,j)} + \epsilon_3 I_{(p-2)d \times (p-2)d})^{-1} [M(y)]_{-(i,j),j} \equiv N_{i,j|-(i,j)}(y), \\ \mathcal{B}_i^* [\hat{\mathfrak{Y}}_{X_i X_j | X_{-(i,j)}}^y(d, \epsilon_Y, \epsilon_3, \epsilon_4)]_{\mathcal{B}_j^*} &= [N_{i,i|-(i,j)}(y) + \epsilon_4 I_{d \times d}]^{-1/2} N_{i,j|-(i,j)}(y) \times \\ &\quad [N_{j,j|-(i,j)}(y) + \epsilon_4 I_{d \times d}]^{-1/2}, \end{aligned}$$

where  $M(y) =_{\mathcal{B}^*} [\hat{\mathfrak{Y}}_{X X}^y(d, \epsilon_Y)]_{\mathcal{B}^*}$ , and its  $(i, j)$ th block  $[M(y)]_{i,j}$  is of dimension  $d \times d$ .

## S.5 Additional sparsity structure

Recall in Theorem 6, our CPO estimator depends on the rate of  $p(\log p/n^{1-\pi-\pi'})^{1/2}$ . This means that the graph dimension  $p$  can only grow at a polynomial rate of the sample size  $n$ . This is partly because we did *not* impose any sparsity structure, but only required the threshold  $\rho_{\text{CPO}}$  approaches zero at the same rate as the minimum signal strength. Next, we consider two explicit sparsity structures, one on the CPO and the other on the CCO. We show that, with such additional sparsity assumptions and some regularized estimation such as hard thresholding, we can further improve the rate in Theorem 6, so that  $p$  can grow at an exponential rate of  $n$ .

The first sparsity structure we consider is explicitly placed on the CPO, by restricting the number of nonzero elements on the off-diagonal elements of the CPO.

**Assumption S1** For  $y \in \Omega_Y$ , there exists  $s_y \in \mathbb{N}$  such that

$$\text{card}(\{(i, j) : [\mathfrak{P}^y]_{i,j} \neq 0, i \neq j\}) = s_y.$$



Although Assumption S1 imposes the sparsity explicitly on the CPO, it indirectly restricts the number of nonzero elements of its inverse, i.e., the CCO, as shown by the next proposition.

**Proposition S4** *If Assumptions 1, 3, 4, and S1 hold, then, for each  $y \in \Omega_Y$ ,*

$$\text{card}(\{(i, j) : [\mathfrak{C}_{XX}^y]_{i,j} \neq 0, i \neq j\}) \leq s_y(s_y - 1).$$

PROOF. For  $y \in \Omega_Y$ , by Assumption S1 there are at most  $s^y$  columns in  $\mathfrak{P}^y$  having at least one nonzero elements, which also implies the remaining columns all have zeros on their off-diagonal elements. Let  $\mathbf{A} = \{i \in \mathbf{V} : [\mathfrak{P}^y]_{i,-i} = 0\}$  index those remaining columns. Then by Definition 3 and the matrix inversion rule, for  $i \in \mathbf{A}$ ,

$$[\mathfrak{C}_{XX}^y]_{i,-i} = -[\mathfrak{P}^y]_{i,-i} \{[\mathfrak{P}^y]_{-i,-i}\}^{-1} = 0.$$

Moreover, for distinct  $i, j \in \mathbf{V} \times \mathbf{V}$ ,  $[\mathfrak{C}_{XX}^y]_{i,j} = 0 \Leftrightarrow X_i \perp X_j$ . This implies there are at least  $p - s^y$  random functions, each independent with the rest of the functions. Therefore, there are at most  $s^y(s^y - 1)$  nonzero off-diagonal elements in  $\mathfrak{C}_{XX}^y$ .  $\square$

Proposition S4 suggests the number of nonzero off-diagonal elements in the CCO is of the order  $s_y^2$ . This means, when  $s_y \ll p$ , the majority of the off-diagonal elements in  $\mathfrak{C}_{XX}^y$  are zero. To take advantage of this sparsity structure, we consider a hard thresholding regularization to estimate the CCO, then the CPO and the graph,

$$\begin{aligned} [\check{\mathfrak{C}}_{XX}^y(d, \epsilon_Y, \epsilon_1, \zeta)]_{i,j} &= [\hat{\mathfrak{C}}_{XX}^y(d, \epsilon_Y, \epsilon_1)]_{i,j} \mathbf{1}(\|[\hat{\mathfrak{C}}_{XX}^y(d, \epsilon_Y, \epsilon_1)]_{i,j}\|_{\text{HS}} \geq \zeta), \\ \check{\mathfrak{P}}^y(d, \epsilon_Y, \epsilon_1, \epsilon_2, \zeta) &= \{\check{\mathfrak{C}}_{XX}^y(d, \epsilon_Y, \epsilon_1, \zeta) + \epsilon_2 I\}^{-1}, \\ \check{\mathbf{E}}_{\text{CPO}}^y(d, \epsilon_Y, \epsilon_1, \epsilon_2, \zeta, \rho_{\text{CPO}}) &= \{(i, j) \in \mathbf{V} \times \mathbf{V} : \|[\check{\mathfrak{P}}^y(d, \epsilon_Y, \epsilon_1, \epsilon_2, \zeta)]_{i,j}\|_{\text{HS}} > \rho_{\text{CPO}}, i \neq j\}. \end{aligned} \quad (\text{S10})$$

where  $\zeta$  is the thresholding parameter. The next theorem establishes the consistency of the estimators in (S10).

**Theorem S1** *If Assumptions 1 to 8, and S1 hold,  $\epsilon_Y, \epsilon_1 \prec 1$ ,  $d^2 \epsilon_Y^{-1} \kappa_d^{-1} (\log p/n)^{1/2} + d^2 \epsilon_Y^\beta \prec 1$ ,  $\delta_y \prec \zeta \prec 1$ , and  $(\epsilon_2^{-1} \zeta s_y^2 + \epsilon_2) \prec \rho_{\text{CPO}}$ , then, for any  $y \in \Omega_Y$ ,*

$$\begin{aligned} \|\check{\mathfrak{C}}_{XX}^y(d, \epsilon_Y, \epsilon_1, \zeta) - \mathfrak{C}_{XX}^y\|_{\text{HS}} &= O_p(\zeta s_y^2); \\ \max_{i,j \in \mathbf{V}, i \neq j} \|[\check{\mathfrak{P}}^y(d, \epsilon_Y, \epsilon_1, \epsilon_2, \zeta)]_{i,j} - [\mathfrak{P}^y]_{i,j}\|_{\text{HS}} &= O_p(\epsilon_2^{-1} \zeta s_y^2 + \epsilon_2); \\ P[\check{\mathbf{E}}_{\text{CPO}}^y(d, \epsilon_Y, \epsilon_1, \epsilon_2, \zeta, \rho_{\text{CPO}}) = \mathbf{E}^y] &\rightarrow 1, \text{ as } n \rightarrow \infty. \end{aligned}$$

PROOF. For any  $\zeta > 0$ , define  $\mathbf{C}_{XX}^{y,\zeta} : \Omega_X \rightarrow \Omega_X$  as,

$$(\mathbf{C}_{XX}^{y,\zeta})_{i,j} = [\mathbf{C}_{XX}^y]_{i,j} \mathbf{1}(\|[\mathbf{C}_{XX}^y]_{i,j}\|_{\text{HS}} \geq \zeta), \quad (i, j) \in \mathbf{V} \times \mathbf{V}.$$

Note that  $\mathbf{C}_{XX}^{y,\zeta}$  is an intermediate operator between  $\check{\mathbf{C}}_{XX}^y(d, \epsilon_Y, \epsilon_1, \zeta)$  and  $\mathbf{C}_{XX}^y$ . For simplicity, write  $\hat{\mathbf{C}}_{XX}^y(d, \epsilon_Y, \epsilon_1)$  as  $\hat{\mathbf{C}}_{XX}^y$ ,  $\hat{\mathbf{C}}_{X_i X_j}^y(d, \epsilon_Y, \epsilon_1)$  as  $\hat{\mathbf{C}}_{X_i X_j}^y$ , and  $\check{\mathbf{C}}_{XX}^y(d, \epsilon_Y, \epsilon_1, \zeta)$  as  $\check{\mathbf{C}}_{XX}^y$ . By the triangular inequality

$$\|\check{\mathbf{C}}_{XX}^y - \mathbf{C}_{XX}^y\|_{\text{HS}} \leq \Delta_4 + \Delta_5,$$

where  $\Delta_4 = \|\check{\mathbf{C}}_{XX}^y - \mathbf{C}_{XX}^{y,\zeta}\|_{\text{HS}}$ , and  $\Delta_5 = \|\mathbf{C}_{XX}^{y,\zeta} - \mathbf{C}_{XX}^y\|_{\text{HS}}$ . Next, we derive the orders of magnitude of  $\Delta_4$  and  $\Delta_5$ , respectively.

For  $\Delta_5$ , we have,

$$\Delta_5 \leq \sum_{i,j \in \mathbf{V}^0} \|\mathbf{C}_{X_i X_j}^y\|_{\text{HS}} \mathbf{1}(\|\mathbf{C}_{X_i X_j}^y\|_{\text{HS}} < \zeta) \leq \zeta \sum_{i,j \in \mathbf{V}^0} \mathbf{1}(\|\mathbf{C}_{X_i X_j}^y\|_{\text{HS}} \neq 0),$$

which by Proposition S4, is further bounded by  $\zeta(s^y)^2$ .

For  $\Delta_4$ , we have

$$\begin{aligned} \Delta_4 &\leq \sum_{i,j \in \mathbf{V}^0} \|\hat{\mathbf{C}}_{X_i X_j}^y - \mathbf{C}_{X_i X_j}^y\|_{\text{HS}} \mathbf{1}(\|\hat{\mathbf{C}}_{X_i X_j}^y\|_{\text{HS}} \geq \zeta, \|\mathbf{C}_{X_i X_j}^y\|_{\text{HS}} \geq \zeta) \\ &\quad + \sum_{i,j \in \mathbf{V}^0} \|\hat{\mathbf{C}}_{X_i X_j}^y\|_{\text{HS}} \mathbf{1}(\|\hat{\mathbf{C}}_{X_i X_j}^y\|_{\text{HS}} \geq \zeta, \|\mathbf{C}_{X_i X_j}^y\|_{\text{HS}} < \zeta) \\ &\quad + \sum_{i,j \in \mathbf{V}^0} \|\mathbf{C}_{X_i X_j}^y\|_{\text{HS}} \mathbf{1}(\|\hat{\mathbf{C}}_{X_i X_j}^y\|_{\text{HS}} < \zeta, \|\mathbf{C}_{X_i X_j}^y\|_{\text{HS}} \geq \zeta) = \Delta_{41} + \Delta_{42} + \Delta_{43}. \end{aligned}$$

We next find the orders of  $\Delta_{41}$  to  $\Delta_{43}$ .

For  $\Delta_{41}$ , we have,

$$\begin{aligned} \Delta_{41} &\leq \max_{i,j \in \mathbf{V}^0} \|\hat{\mathbf{C}}_{X_i X_j}^y - \mathbf{C}_{X_i X_j}^y\|_{\text{HS}} [\sum_{i,j \in \mathbf{V}^0} \mathbf{1}(\|\hat{\mathbf{C}}_{X_i X_j}^y\|_{\text{HS}} \geq \zeta, \|\mathbf{C}_{X_i X_j}^y\|_{\text{HS}} \geq \zeta)] \\ &\leq \max_{i,j \in \mathbf{V}^0} \|\hat{\mathbf{C}}_{X_i X_j}^y - \mathbf{C}_{X_i X_j}^y\|_{\text{HS}} [\sum_{i,j \in \mathbf{V}^0} \mathbf{1}(\|\mathbf{C}_{X_i X_j}^y\|_{\text{HS}} \neq 0)], \end{aligned}$$

whose order of magnitude is  $O_P[\delta(y)(s^y)^2]$ , by Theorem 5 and Proposition S4.

For  $\Delta_{43}$ , we have,

$$\begin{aligned} \Delta_{43} &\leq \sum_{i,j \in \mathbf{V}^0} \|\hat{\mathbf{C}}_{X_i X_j}^y - \mathbf{C}_{X_i X_j}^y\|_{\text{HS}} \mathbf{1}(\|\hat{\mathbf{C}}_{X_i X_j}^y\|_{\text{HS}} < \zeta, \|\mathbf{C}_{X_i X_j}^y\|_{\text{HS}} \geq \zeta) \\ &\quad + \sum_{i,j \in \mathbf{V}^0} \|\hat{\mathbf{C}}_{X_i X_j}^y\|_{\text{HS}} \mathbf{1}(\|\hat{\mathbf{C}}_{X_i X_j}^y\|_{\text{HS}} < \zeta, \|\mathbf{C}_{X_i X_j}^y\|_{\text{HS}} \geq \zeta). \end{aligned}$$

Following a similar argument for the order of  $\Delta_{41}$ , we can show that the orders of two terms on the right above are  $O_P[\delta_n(y)(s^y)^2]$  and  $O_P[\zeta(s^y)^2]$ . Therefore,  $\Delta_{13} =$

$O_P[\zeta(s^y)^2]$ .

For  $\Delta_{42}$ , we have,

$$\begin{aligned} \Delta_{42} &\leq \sum_{i,j \in \mathcal{V}^0} \|\hat{\mathfrak{C}}_{X_i X_j}^y - \mathfrak{C}_{X_i X_j}^y\|_{\text{HS}} \mathbf{1}(\|\hat{\mathfrak{C}}_{X_i X_j}^y\|_{\text{HS}} \geq \zeta, \|\mathfrak{C}_{X_i X_j}^y\|_{\text{HS}} < \zeta) \\ &\quad + \sum_{i,j \in \mathcal{V}^0} \|\mathfrak{C}_{X_i X_j}^y\|_{\text{HS}} \mathbf{1}(\|\hat{\mathfrak{C}}_{X_i X_j}^y\|_{\text{HS}} \geq \zeta, \|\mathfrak{C}_{X_i X_j}^y\|_{\text{HS}} < \zeta) \equiv \Delta_{421} + \Delta_{422}. \end{aligned}$$

Note that  $\Delta_{422} \leq \Delta_2 = O_P[\zeta(s^y)^2]$ . Moreover, given  $c \in (0, 1)$ ,  $\Delta_{421} \leq \Delta_{4211} + \Delta_{4212}$ , where

$$\begin{aligned} \Delta_{4211} &= \sum_{i,j \in \mathcal{V}^0} \|\hat{\mathfrak{C}}_{X_i X_j}^y - \mathfrak{C}_{X_i X_j}^y\|_{\text{HS}} \mathbf{1}(\|\hat{\mathfrak{C}}_{X_i X_j}^y\|_{\text{HS}} \geq \zeta, c\zeta < \|\mathfrak{C}_{X_i X_j}^y\|_{\text{HS}} < \zeta), \\ \Delta_{4212} &= \sum_{i,j \in \mathcal{V}^0} \|\hat{\mathfrak{C}}_{X_i X_j}^y - \mathfrak{C}_{X_i X_j}^y\|_{\text{HS}} \mathbf{1}(\|\hat{\mathfrak{C}}_{X_i X_j}^y\|_{\text{HS}} \geq \zeta, \|\mathfrak{C}_{X_i X_j}^y\|_{\text{HS}} \leq c\zeta). \end{aligned}$$

For  $\Delta_{4211}$ , by Theorem 5 and the fact that,

$$\Delta_{4211} \leq \max_{i,j \in \mathcal{V}^0} \|\hat{\mathfrak{C}}_{X_i X_j}^y - \mathfrak{C}_{X_i X_j}^y\|_{\text{HS}} [\sum_{i,j \in \mathcal{V}^0} \mathbf{1}(c\zeta < \|\mathfrak{C}_{X_i X_j}^y\|_{\text{HS}} < \zeta)],$$

the order of magnitude of  $\Delta_{4211}$  is  $O_P[\delta_n(y)(s^y)^2]$ .

For  $\Delta_{4212}$ , we have,

$$\Delta_{4212} \leq \max_{i,j \in \mathcal{V}^0} \|\hat{\mathfrak{C}}_{X_i X_j}^y - \mathfrak{C}_{X_i X_j}^y\|_{\text{HS}} \{\sum_{i,j \in \mathcal{V}^0} \mathbf{1}[\|\hat{\mathfrak{C}}_{X_i X_j}^y - \mathfrak{C}_{X_i X_j}^y\|_{\text{HS}} \geq (1-c)\zeta]\},$$

because  $\|\hat{\mathfrak{C}}_{X_i X_j}^y - \mathfrak{C}_{X_i X_j}^y\|_{\text{HS}} \geq \|\hat{\mathfrak{C}}_{X_i X_j}^y\|_{\text{HS}} - \|\mathfrak{C}_{X_i X_j}^y\|_{\text{HS}} \geq (1-c)\zeta$ . In addition,

$$\begin{aligned} P\left(\left\{\sum_{i,j \in \mathcal{V}^0} \mathbf{1}[\|\hat{\mathfrak{C}}_{X_i X_j}^y - \mathfrak{C}_{X_i X_j}^y\|_{\text{HS}} \geq (1-c)\zeta]\right\} > 0\right) &\leq \\ &P\left[\max_{i,j \in \mathcal{V}^0} \|\hat{\mathfrak{C}}_{X_i X_j}^y - \mathfrak{C}_{X_i X_j}^y\|_{\text{HS}} \geq (1-c)\zeta\right], \end{aligned}$$

which tends to 0 by the condition  $\delta_n(y) \prec \zeta$ . Therefore,  $\sum_{i,j \in \mathcal{V}^0} \mathbf{1}[\|\hat{\mathfrak{C}}_{X_i X_j}^y - \mathfrak{C}_{X_i X_j}^y\|_{\text{HS}} \geq (1-c)\zeta] = o_P(1)$ , which implies  $\Delta_{4212} = o_P[\delta_n(y)]$ .

Combining the orders of  $\Delta_{41}$ ,  $\Delta_{4211}$ ,  $\Delta_{4212}$ ,  $\Delta_{422}$ ,  $\Delta_{43}$ , and  $\Delta_5$ , we obtain the convergence rate of  $\|\check{\mathfrak{C}}_{XX}^y(d, \epsilon_Y, \epsilon_1, \zeta) - \mathfrak{C}_{XX}^y\|_{\text{HS}}$ .

Following a similar argument as that of Theorem 6, we can show the convergence of  $\max_{i,j \in \mathcal{V}, i \neq j} \|[\check{\mathfrak{P}}^y(d, \epsilon_Y, \epsilon_1, \epsilon_2, \zeta)]_{i,j} - [\mathfrak{P}^y]_{i,j}\|_{\text{HS}}$  and  $P[\check{\mathbb{E}}_{\text{CPO}}^y(d, \epsilon_Y, \epsilon_1, \epsilon_2, \zeta, \rho_{\text{CPO}}) = \mathbb{E}^y]$ . This completes the proof.  $\square$

Theorem S1 suggests that the uniform convergence rate of  $\check{\mathfrak{P}}^y(d, \epsilon_Y, \epsilon_1, \epsilon_2, \zeta)$  depends on  $s_y^2(\log p/n)^{(1-c)/2}$ , which indicates that  $p$  can diverge at an exponential rate of  $n$ .

The second sparsity structure we consider is explicitly placed on the CCO, by directly restricting the number of nonzero elements on the off-diagonal elements of the CCO this time, instead of the CPO as in Assumption S1.

**Assumption S2** For  $y \in \Omega_Y$ , there exists  $s_y \in \mathbb{N}$  such that

$$\text{card}(\{(i, j) : [\mathfrak{C}_{XX}^y]_{i,j} \neq 0, i \neq j\}) = s_y.$$

We consider the hard thresholding estimators in (S10), and show in the next theorem that, when replacing Assumption S1 with Assumption S2, we can further improve the order of magnitude from  $s_y^2 \zeta$  to  $s_y \zeta$ . The proof of the theorem is similar to that of Theorem S1 and is omitted.

**Theorem S2** If Assumptions 1 to 8, and S2 hold,  $\epsilon_Y, \epsilon_1 \prec 1$ ,  $d^2 \epsilon_Y^{-1} \kappa_d^{-1} (\log p/n)^{1/2} + d^2 \epsilon_Y^\beta \prec 1$ ,  $\delta_y \prec \zeta \prec 1$ , and  $(\epsilon_2^{-1} \zeta s_y + \epsilon_2) \prec \rho_{\text{CPO}}$ , then, for any  $y \in \Omega_Y$ ,

$$\begin{aligned} & \|\check{\mathfrak{C}}_{XX}^y(d, \epsilon_Y, \epsilon_1, \zeta) - \mathfrak{C}_{XX}^y\|_{\text{HS}} = O_p(\zeta s_y); \\ & \max_{i,j \in \mathcal{V}, i \neq j} \|[\check{\mathfrak{P}}^y(d, \epsilon_Y, \epsilon_1, \epsilon_2, \zeta)]_{i,j} - [\mathfrak{P}^y]_{i,j}\|_{\text{HS}} = O_p(\epsilon_2^{-1} \zeta s_y + \epsilon_2); \\ & P[\check{\mathfrak{E}}_{\text{CPO}}^y(d, \epsilon_Y, \epsilon_1, \epsilon_2, \zeta, \rho_{\text{CPO}}) = \mathbf{E}^y] \rightarrow 1, \text{ as } n \rightarrow \infty. \end{aligned}$$

Finally, we remark that, for both sparsity structures, we allow  $s_y$  to grow at the polynomial order of  $n$ . Besides, we have only considered the estimation by hard thresholding. Other regularization approaches such as the  $\ell_1$  penalty (Rothman et al., 2008; Cai et al., 2011) can also be used to encourage the sparsity.

## S.6 Effect of tuning parameters and kernel functions

Our method involves a number of tuning parameters. We investigate the effect of those parameters on the proposed graph estimator. Overall, we have found our method is robust to the tuning parameters as long as they are within a reasonable range.

We first examine the effect of the parameters  $m$ ,  $\epsilon_T$  and  $\gamma_T$  that govern the construction of the coordinates. Recall that  $m$  is the number of basis of  $\Omega^N$ ,  $\epsilon_T$  is the ridge parameter in (12), and  $\gamma_T$  is the bandwidth in the radial basis function kernel. They all control the level of smoothness on the estimation of  $X_i^k$ . Figure S1 in the Appendix reports the area under the ROC curve with varying values of  $m$ ,  $\epsilon_T$  and  $\gamma_T$ . We see that the estimated graph is robust to the choice of these parameters.

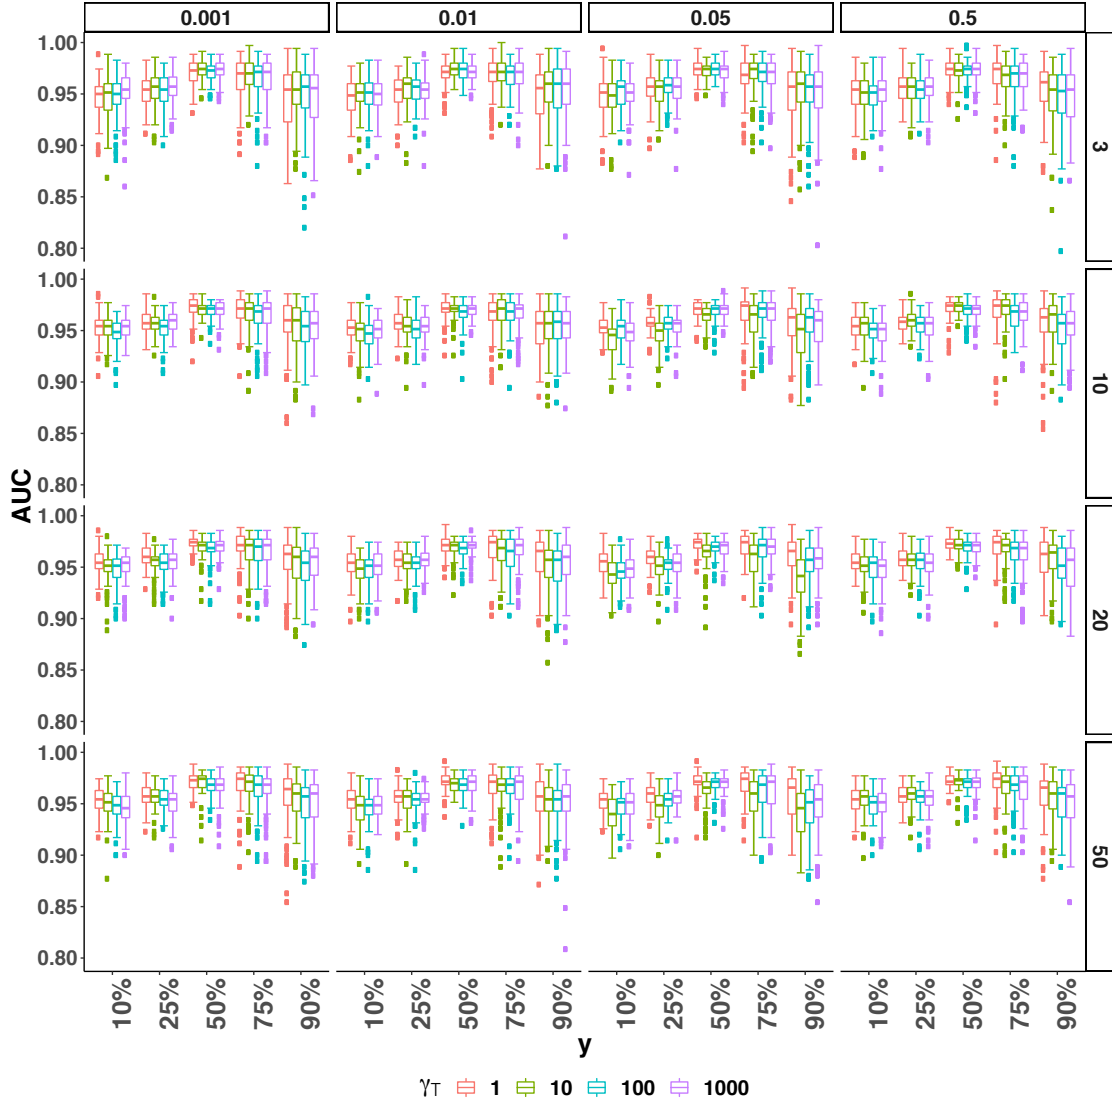

Figure S1: Area under the ROC curve for the reconstructed graph, with varying parameters  $\epsilon_T$  (upper axis),  $m$  (right axis), and  $\gamma_T$  (colored boxes).

We next investigate the effect of  $d$ , the number of leading K-L coefficients used to approximate  $X_i^k$ . Figure S2 reports the area under the ROC curve with varying values of  $d$  from 2 to 10. We see that the performance remains about the same after  $d$  reaches 5.

We then study the effect of the ridge parameter  $\epsilon_Y$ , which controls the smoothness of the estimated regression operator  $\hat{\mathfrak{M}}_{X_{ij}|Y}(\epsilon_Y)$ , and the two ridge parameters  $\epsilon_1$  and  $\epsilon_2$ , which control the smoothness of the estimators of the conditional correlation

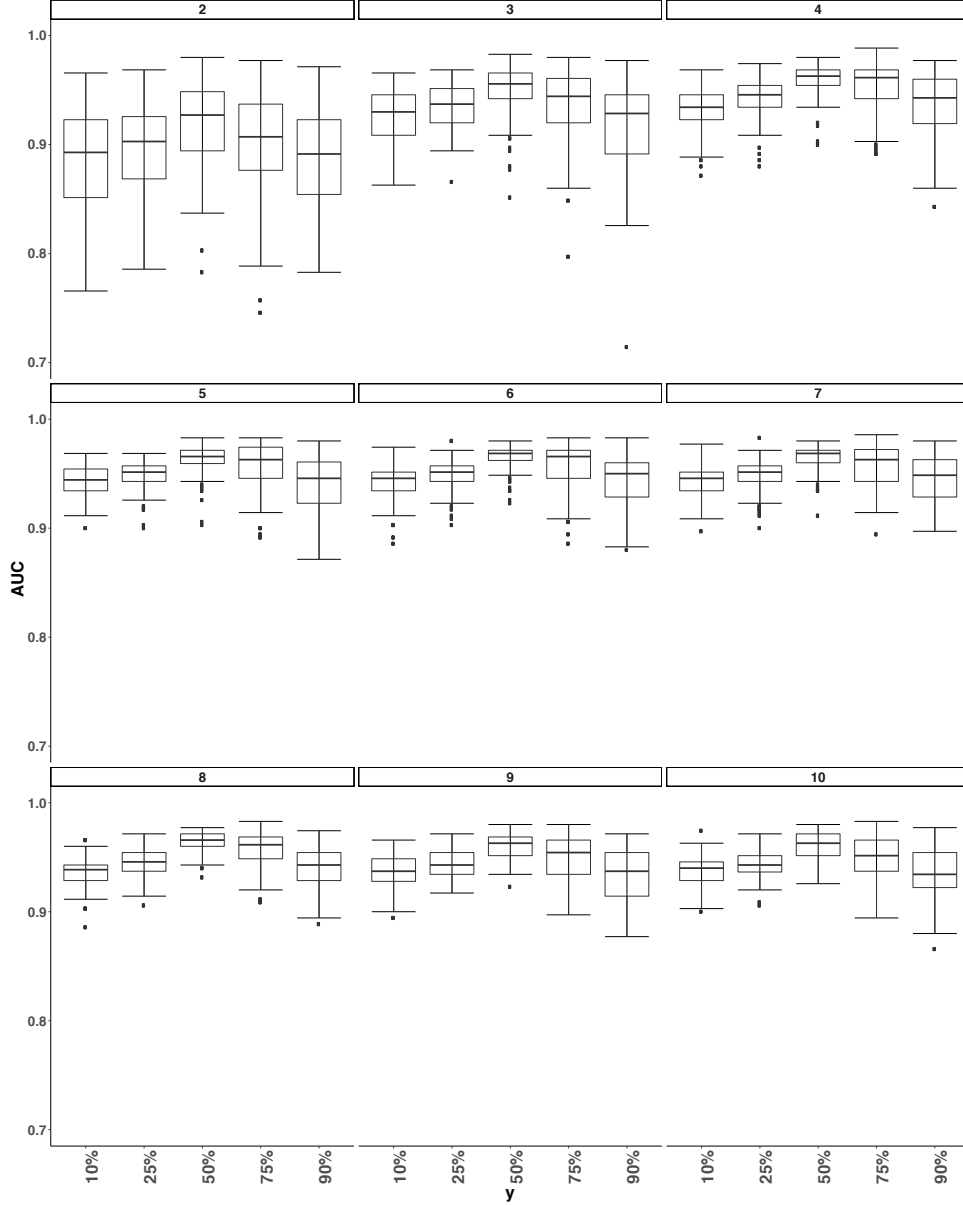

Figure S2: Area under the ROC curve for the reconstructed graph, with the varying parameter  $d$ .

operator  $\hat{\mathcal{C}}_{XX}^y(d, \epsilon_Y, \epsilon_1)$  and the conditional precision operator  $\hat{\mathcal{P}}^y(d, \epsilon_Y, \epsilon_1, \epsilon_2)$ . Figure S3 reports the H-S norm of the CPO estimator under varying values of  $\epsilon_Y$ . We see that, within a reasonable range of  $\epsilon_Y$ , the CPO estimate is relatively robust. Figure S4 reports the H-S norm of the CPO estimator under varying values of  $\epsilon_1$  and  $\epsilon_2$  for the random graph. We observe that, a different value of  $\epsilon_1$  or  $\epsilon_2$  leads to a change of

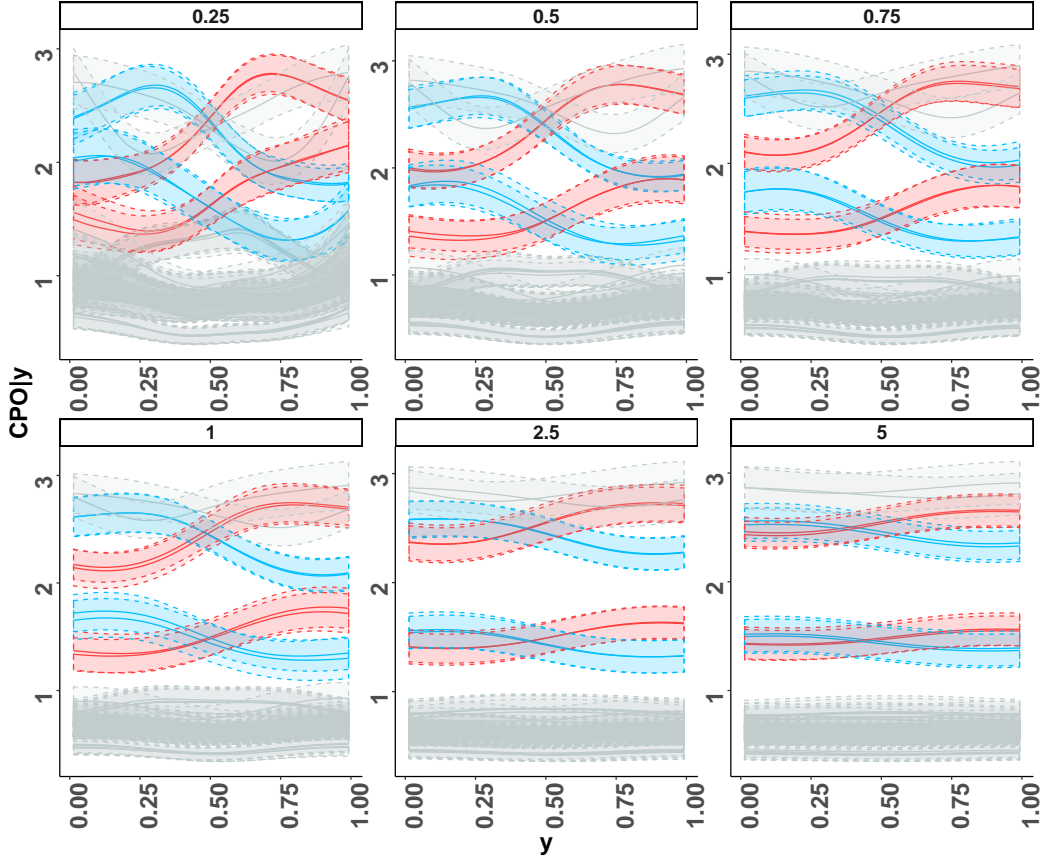

Figure S3: The Hilbert-Schmidt norm of the CPO estimator, with the varying parameter  $\epsilon_Y$

the scale of the H-S norm of the CPO, but the overall pattern does not change. This suggests that our CPO estimator is relatively robust with respect to  $\epsilon_1$  and  $\epsilon_2$  too.

Finally, we study the performance of the CPO with different choices of the kernel function. Specifically, we generate the error function  $\varepsilon(t)$  using a Brownian or Gaussian kernel as the basis function. We then choose a Brownian or Gaussian kernel for  $\kappa_T$ , and a Laplacian, Student  $t$  or Gaussian kernel for  $\kappa_Y$ . This leads to 12 combinations of  $(\varepsilon(t), \kappa_T, \kappa_Y)$ . Figure S5 reports the area under the ROC curve for the graph estimated by our CPO method for those different combinations. It is seen that the performance of our method is consistent across all combinations.

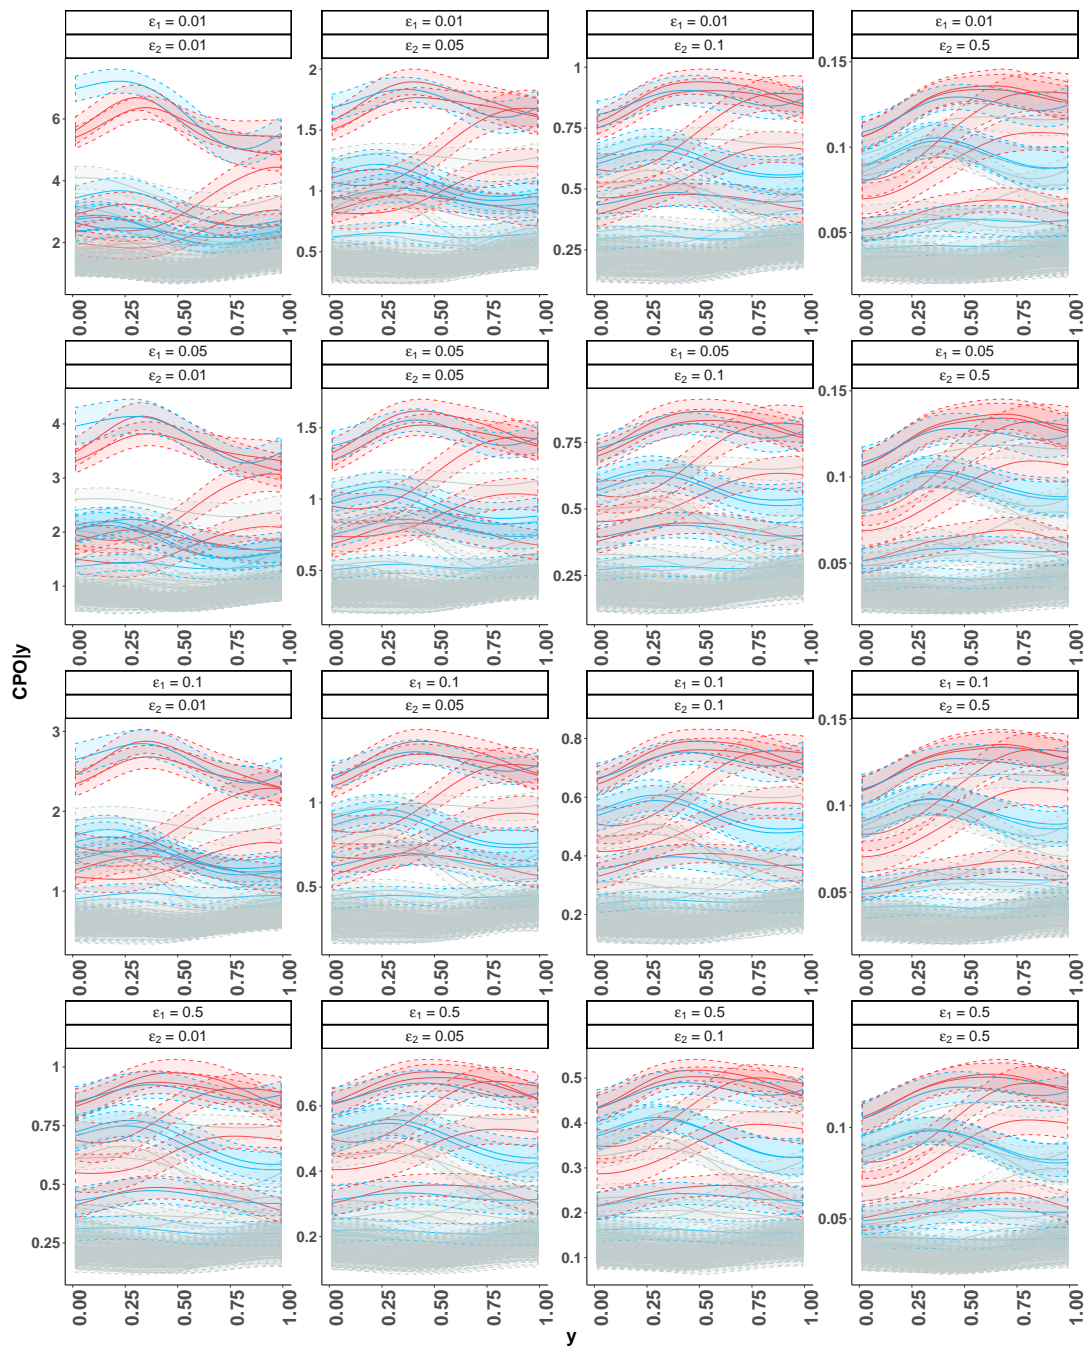

Figure S4: Norm of the CPO estimator, with the varying parameters  $\epsilon_1$  (upper axis) and  $\epsilon_2$  (right axis).



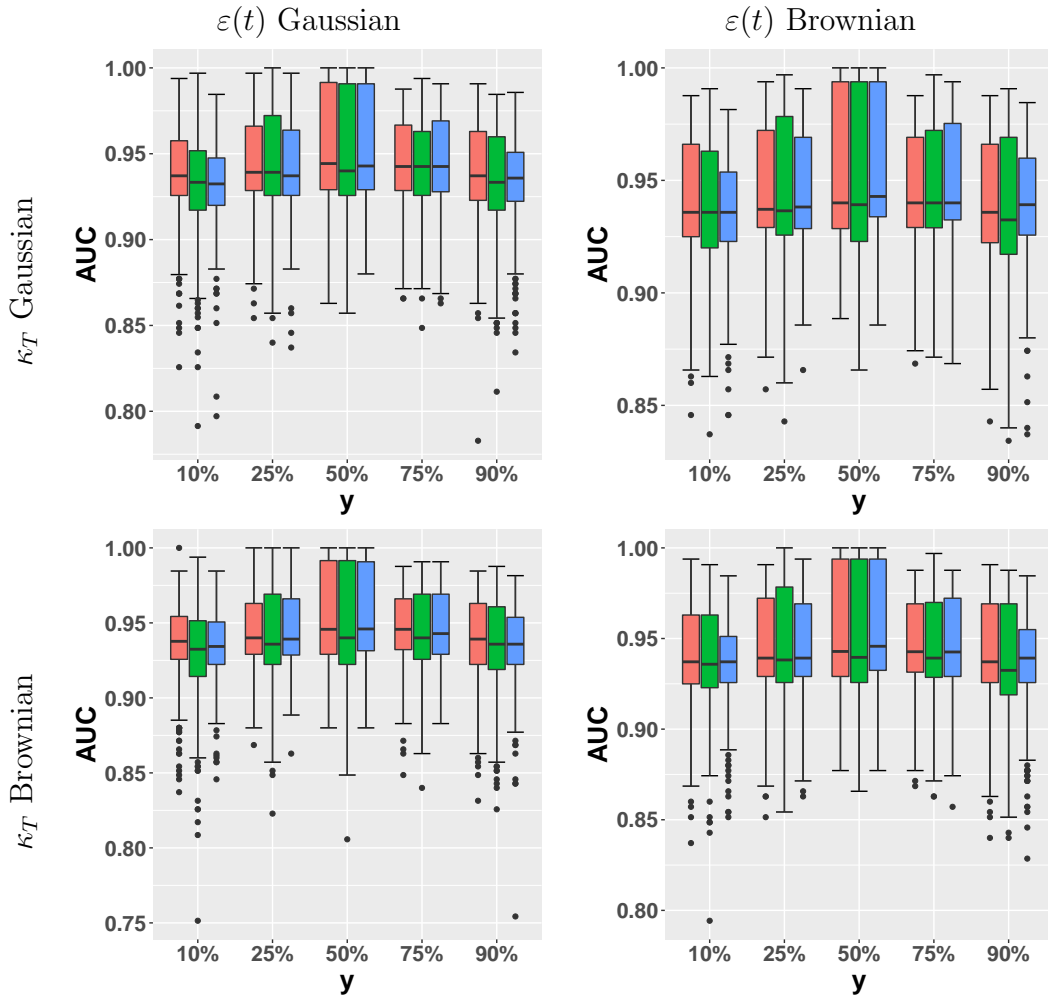

Figure S5: Area under the ROC curve of the estimated graph by the CPO, with respect to the external variable  $Y$ , under three kernel functions for  $\kappa_Y$ : Gaussian (red), Laplacian (green) and Student  $t$  (blue), two kernel functions for  $\kappa_T$ : Gaussian (top) and Brownian (bottom), and two kernel functions for  $\varepsilon(t)$ : Gaussian (left) and Brownian (right).

## S.7 Brain connectivity validation analysis

We report the analysis result of an independent validation dataset of 828 subjects from HCP. Figure S6 reports the changes of the identified significant edges, with respect to the intelligence score at 7, 11, 15, 19, 23, for the medial frontal module from the new dataset. The finding is similar to that reported in the paper.

## References

- Bach, F. (2009). High-dimensional non-linear variable selection through hierarchical kernel learning. *arXiv preprint arXiv:0909.0844*.
- Bach, F. R. (2008). Consistency of the group lasso and multiple kernel learning. *Journal of Machine Learning Research*, 9:1179–1225.
- Bosq, D. (2000). *Linear Processes in Function Spaces*. Springer, New York.
- Cai, T., Liu, W., and Luo, X. (2011). A Constrained  $\ell_1$  Minimization Approach to Sparse Precision Matrix Estimation. *Journal of the American Statistical Association*, 106(494):594–607.
- Fukumizu, K., Bach, F. R., and Jordan, M. I. (2009). Kernel dimension reduction in regression. *The Annals of Statistics*, 37(5):1871–1905.
- Hanson, D. L. and Wright, F. T. (1971). A bound on tail probabilities for quadratic forms in independent random variables. *Ann. Math. Statist.*, 42(3):1079–1083.
- Kato, T. (1980). *Perturbation Theory of Linear Operators*. Springer.
- Kazdan, J. L. (1971). Perturbation of complete orthonormal sets and eigen-function expansions. *Proceedings of the American Mathematical Society*, 27:506–510.
- Li, B. and Solea, E. (2018). A nonparametric graphical model for functional data with application to brain networks based on fmri. *Journal of the American Statistical Association*, 113(524):1637–1655.
- Rothman, A. J., Bickel, P. J., Levina, E., and Zhu, J. (2008). Sparse permutation invariant covariance estimation. *Electronic Journal of Statistics*, 2(0):494–515.

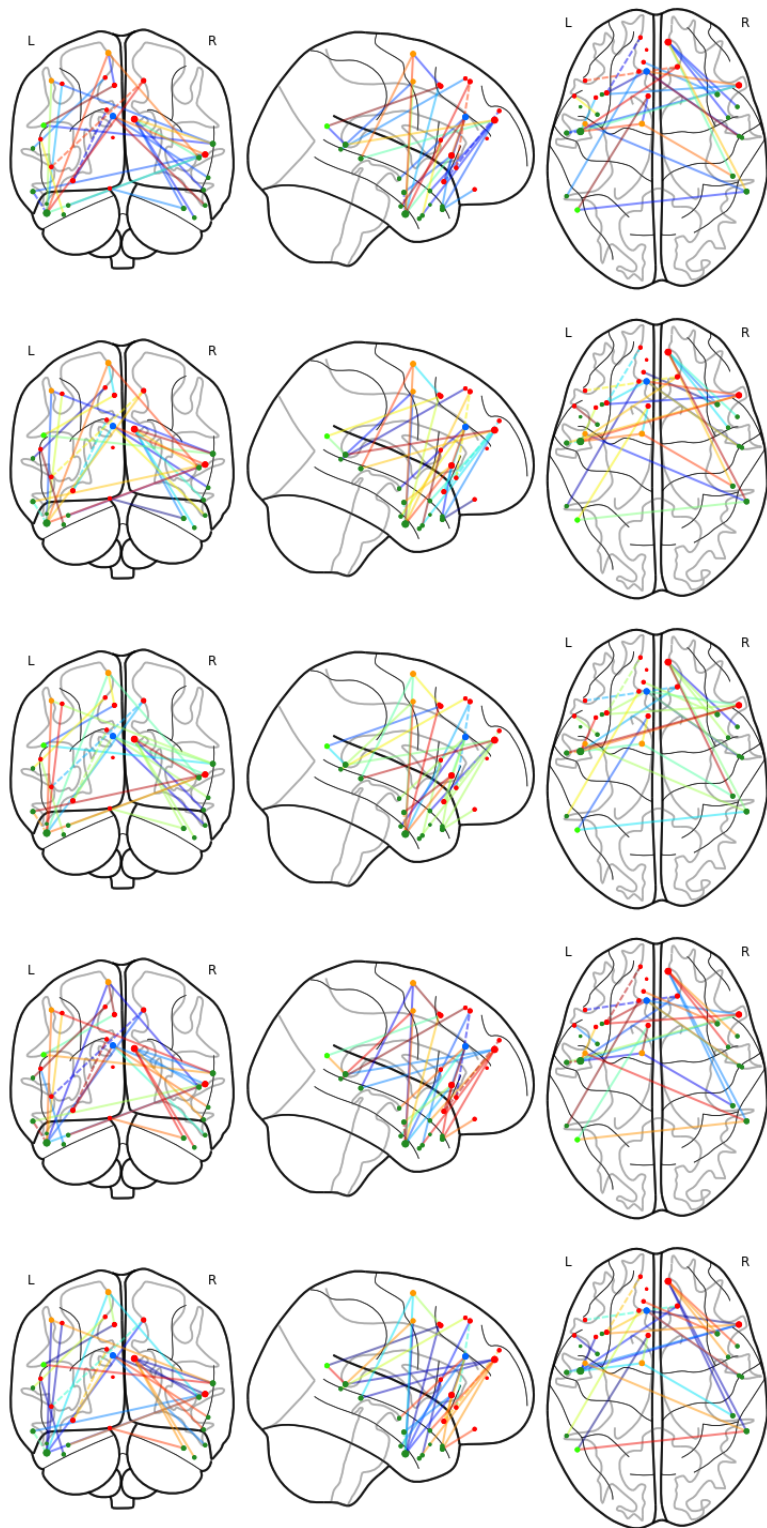

Figure S6: Medial frontal network changes, with respect to the intelligence score at 7, 11, 15, 19, 23, based on an independent validation dataset. Blue color represents the small H-S norm value of CPO, green the medium norm value, and red the high H-S norm value.
